# Supplementary material for: ZnCo2O4@g-C3N4@Cu as a new and highly efficient heterogeneous photocatalyst for visible light-induced cyanation and Mizoroki–Heck cross-coupling reactions
Source: Royal Society of Chemistry journal article supplement (doi:10.1039/d4ra04827j), 2024-01-01
Supplement: d4ra04827j1.pdf [file d4ra04827j1.pdf]

## Supporting Information

### **ZnCo<sub>2</sub>O<sub>4</sub>@g-C<sub>3</sub>N<sub>4</sub>@Cu as a new and highly efficient heterogeneous photocatalyst for visible light-induced cyanation and Mizoroki-Heck cross-coupling reactions**

Roya Jahanshahi,<sup>b</sup> Hadis Hosseini Moghadam,<sup>b</sup> Sara Sobhani\*<sup>a,b</sup> and Jose' Miguel Sansano<sup>c</sup>

**Author addresses:**

<sup>a</sup> *Department of Chemistry, College of Sciences, Shiraz University, Shiraz 71454, Iran.*

<sup>b</sup> *Department of Chemistry, College of Sciences, University of Birjand, Birjand, Iran.*

*\*Email address of the corresponding author: ssobhani@birjand.ac.ir*

<sup>c</sup> *Departamento de Química Orgánica, Facultad de Ciencias, Centro de Innovación en Química Avanzada (ORFEO-CINQA) and Instituto de Síntesis Orgánica (ISO), Universidad de Alicante, Apdo. 99, 03080-Alicante, Spain.*

## Experimental

### Materials and instruments

All chemicals and solvents were purchased from Merck chemical company and were used directly without further treatment. The purity of the products and the progress of the reactions were monitored using TLC on silica-gel Polygram SILG/UV254 plates. FT-IR spectra were recorded with a JASCO FT-IR 460 plus spectrophotometer within the 400-4000  $\text{cm}^{-1}$  range using KBr disc at room temperature. X-ray photoelectron spectroscopy (XPS) analyses were carried out using a VG-Microtech Multilab 3000 spectrometer, equipped with an Al anode. The deconvolution of the spectra was carried out by using Gaussian Lorentzian curves. X-ray powder diffraction (XRD) was carried out on an Xpert Pro Panalytical diffractometer (PW1730, PHILIPS company) with Cu  $K\alpha$  radiation ( $\lambda = 1.540 \text{ \AA}$ ). Energy-dispersive X-ray spectroscopy (EDS) and elemental mapping were performed using a TESCAN MIRA3 instrument. Transmission electron microscopy (TEM) was done using the TEM microscope JEOL JEM-1400 Plus. FESEM microscopy is performed in a Hitachi model S3000N. The content of copper in the catalyst was determined by OPTIMA 7300DV ICP-OES analyzer. UV-vis diffuse reflectance spectroscopy (DRS) was conducted using a Shimadzu spectrophotometer (UV-2550 model). The NMR spectra were provided by Bruker Avance 300 and 400 MHz instruments in  $\text{CDCl}_3$  and  $\text{DMSO}-d_6$ , in the presence of tetramethylsilane as the internal standard and the coupling constants ( $J$  values) are given in Hz.

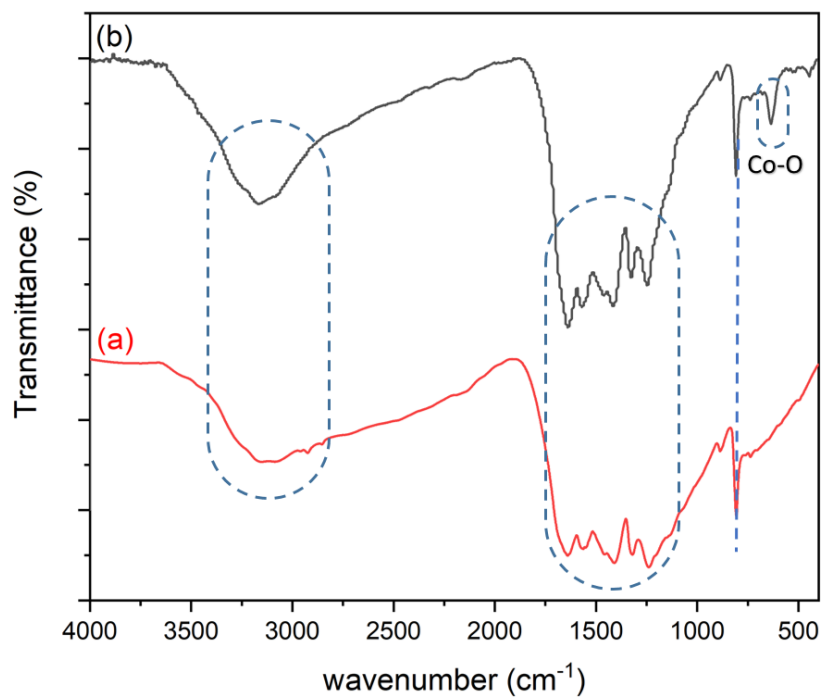

**Figure S1.** FT-IR spectra of (a)  $g\text{-C}_3\text{N}_4$  and (b)  $\text{ZnCo}_2\text{O}_4@g\text{-C}_3\text{N}_4@Cu$ .

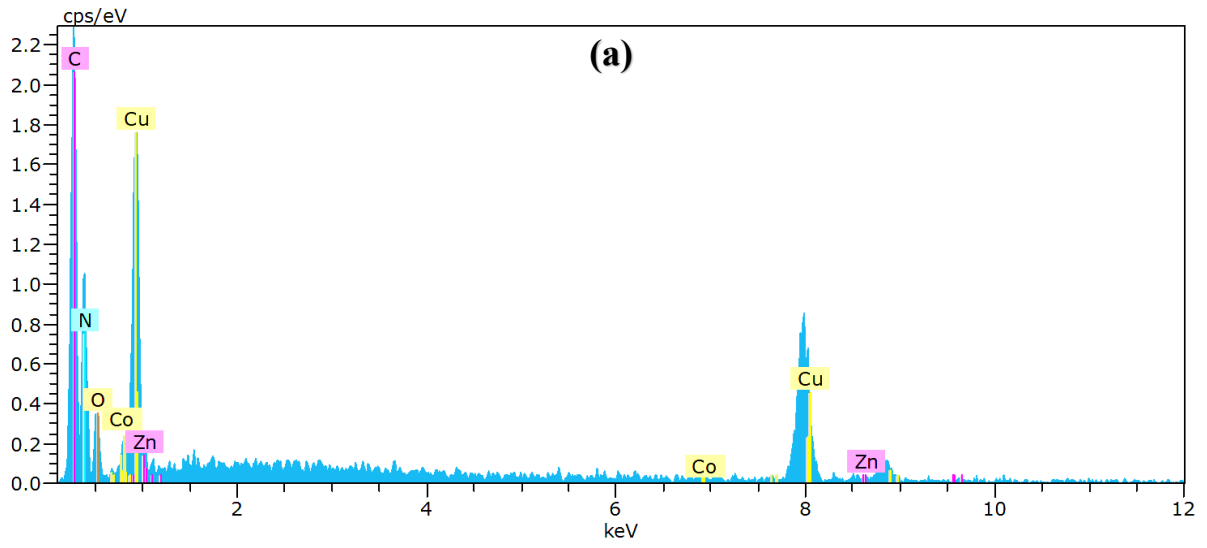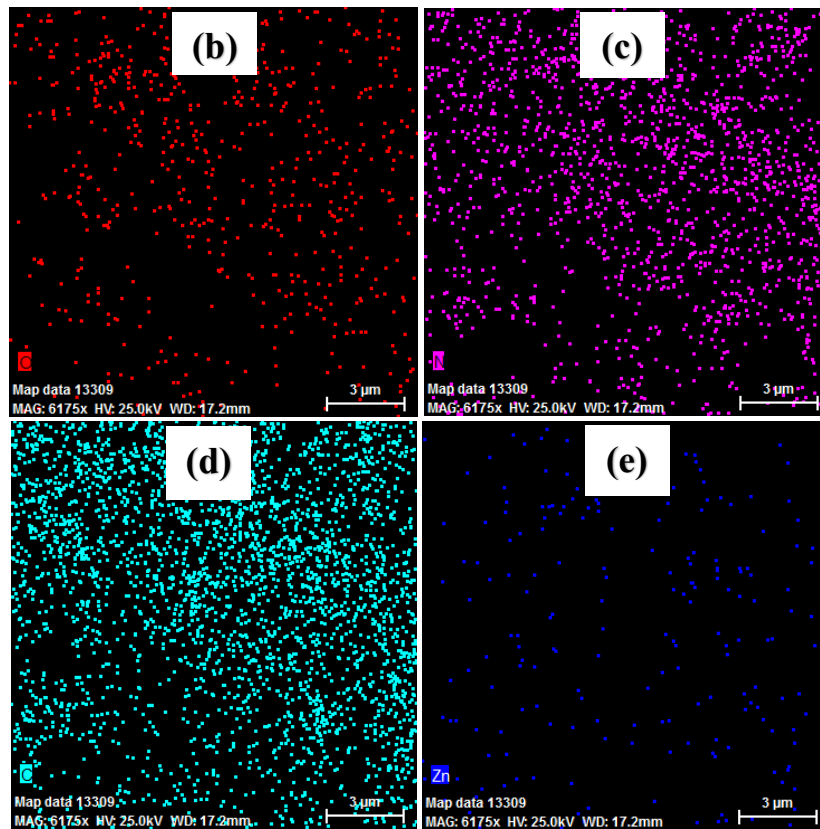

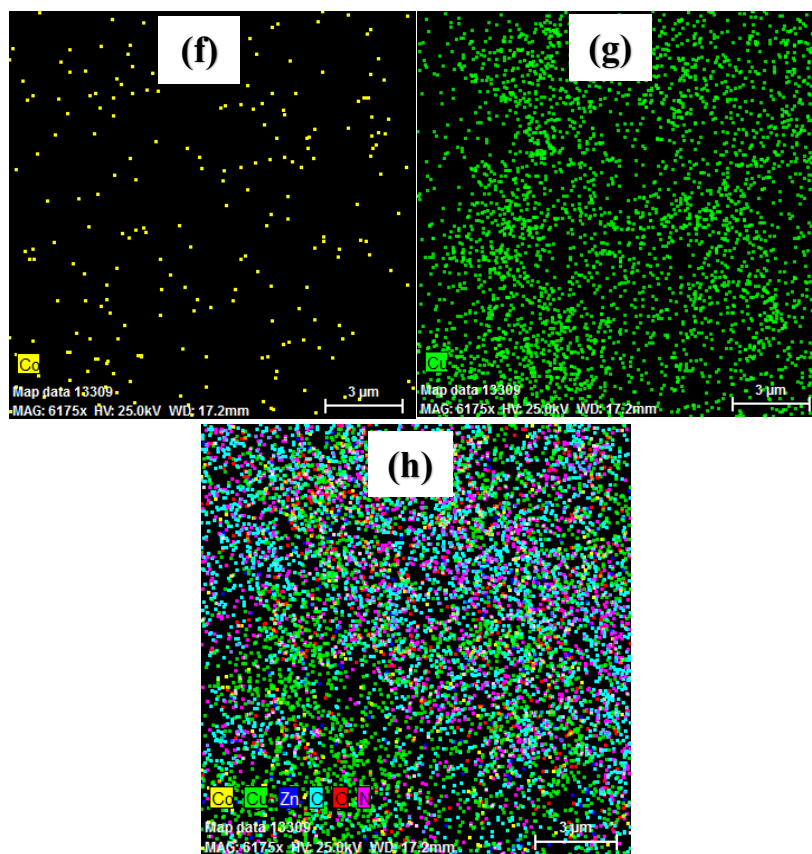

**Figure S2.** (a) EDS analysis and elemental mapping images of (b) oxygen (red), (c) nitrogen (purple), (d) carbon (cyan), (e) zinc (blue), (f) cobalt (yellow), (g) copper (green) and (h) the overlapping of O, N, C, Zn, Co and Cu elements in  $\text{ZnCo}_2\text{O}_4@g\text{-C}_3\text{N}_4@Cu$ .

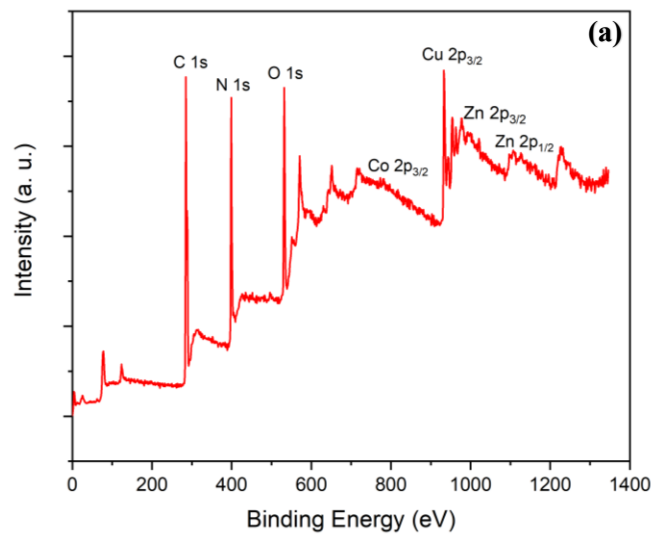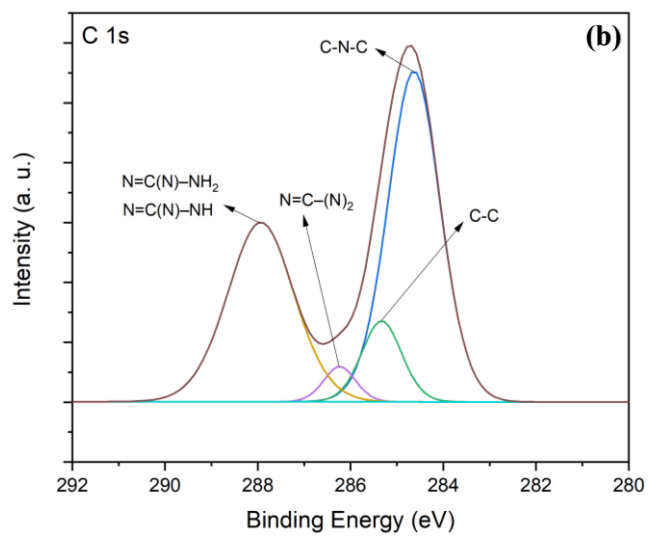

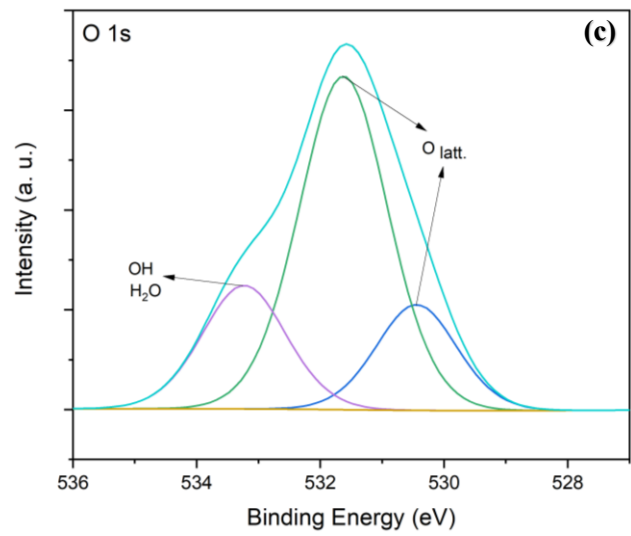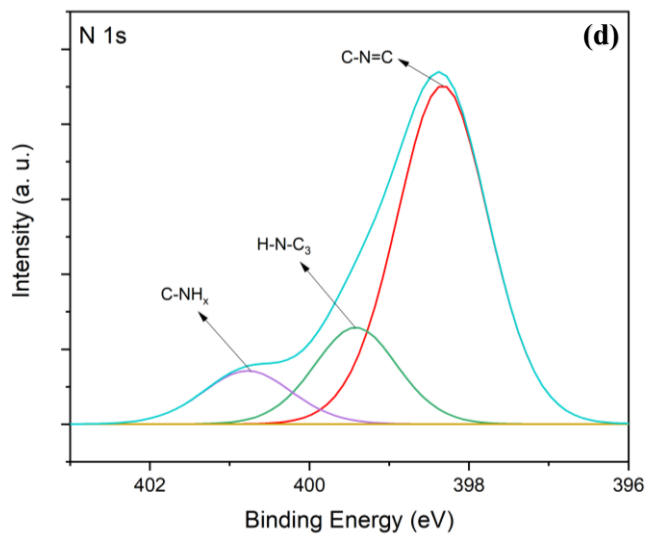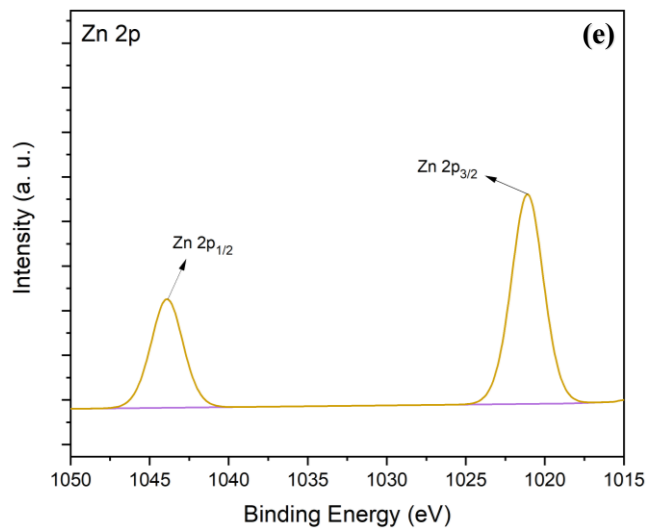

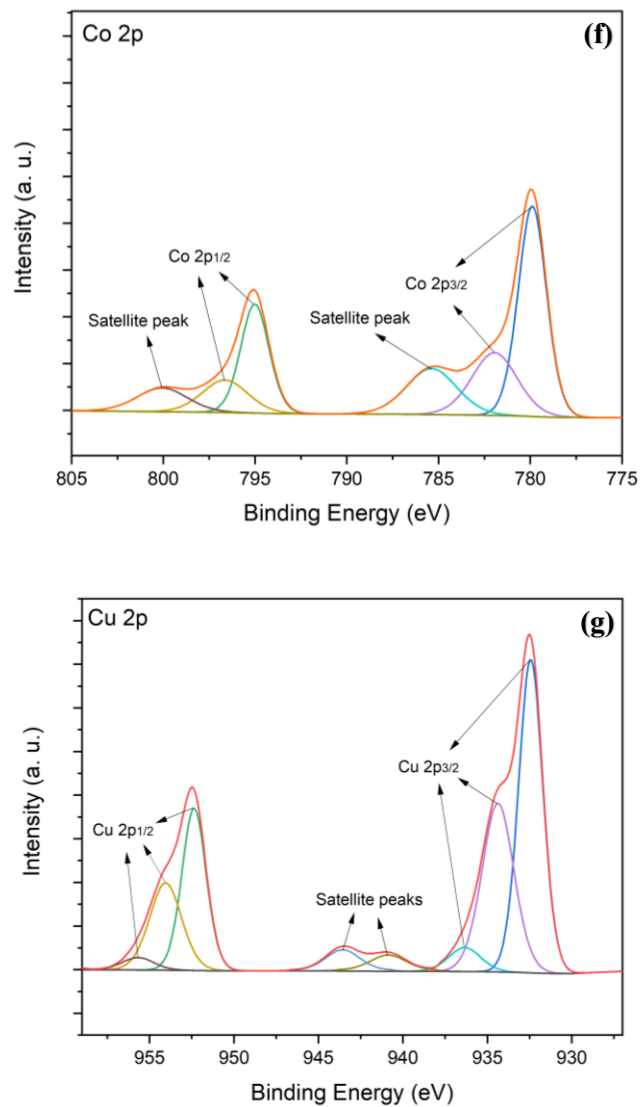

**Figure S3.** (a) XPS analysis of  $\text{ZnCo}_2\text{O}_4@g\text{-C}_3\text{N}_4@\text{Cu}$ , (b) C 1s, (c) O 1s, (d) N 1s, (e) Zn 2p, (f) Co 2p and (g) Cu 2p.



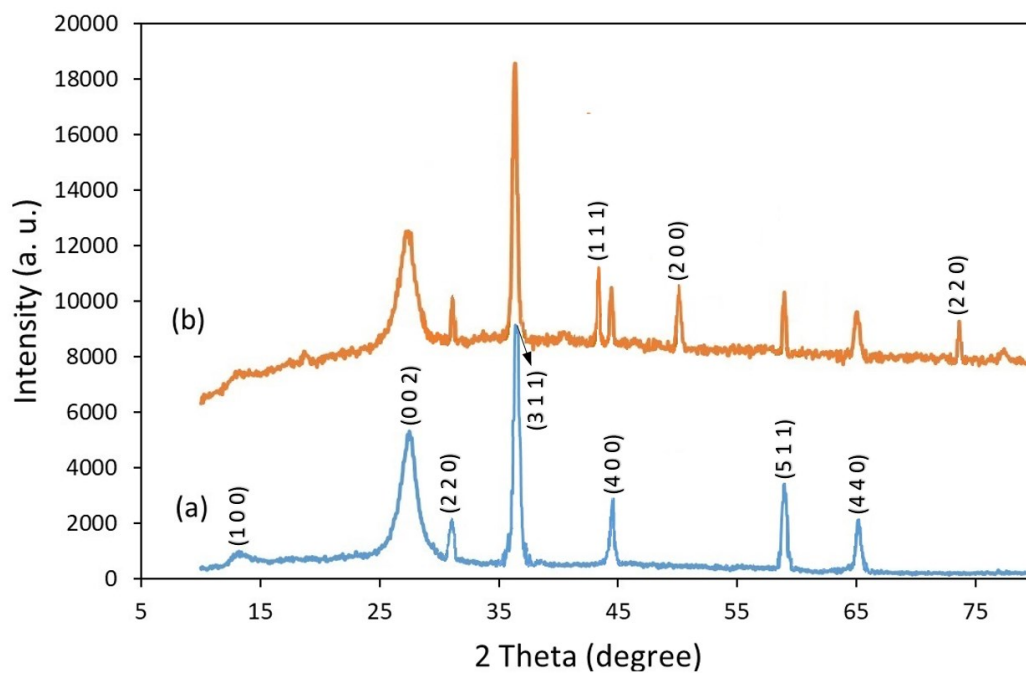

**Figure S4.** XRD patterns of (a)  $\text{ZnCo}_2\text{O}_4@g\text{-C}_3\text{N}_4$  and (b)  $\text{ZnCo}_2\text{O}_4@g\text{-C}_3\text{N}_4@Cu$ .

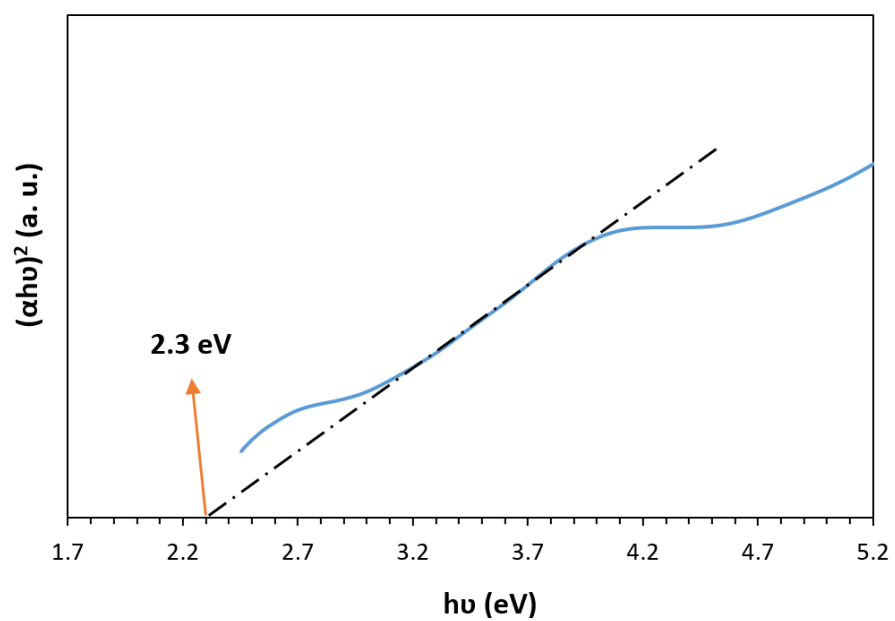

**Figure S5.** Tauc plot of  $\text{ZnCo}_2\text{O}_4@g\text{-C}_3\text{N}_4@\text{Cu}$  for the estimation of band gap energy.

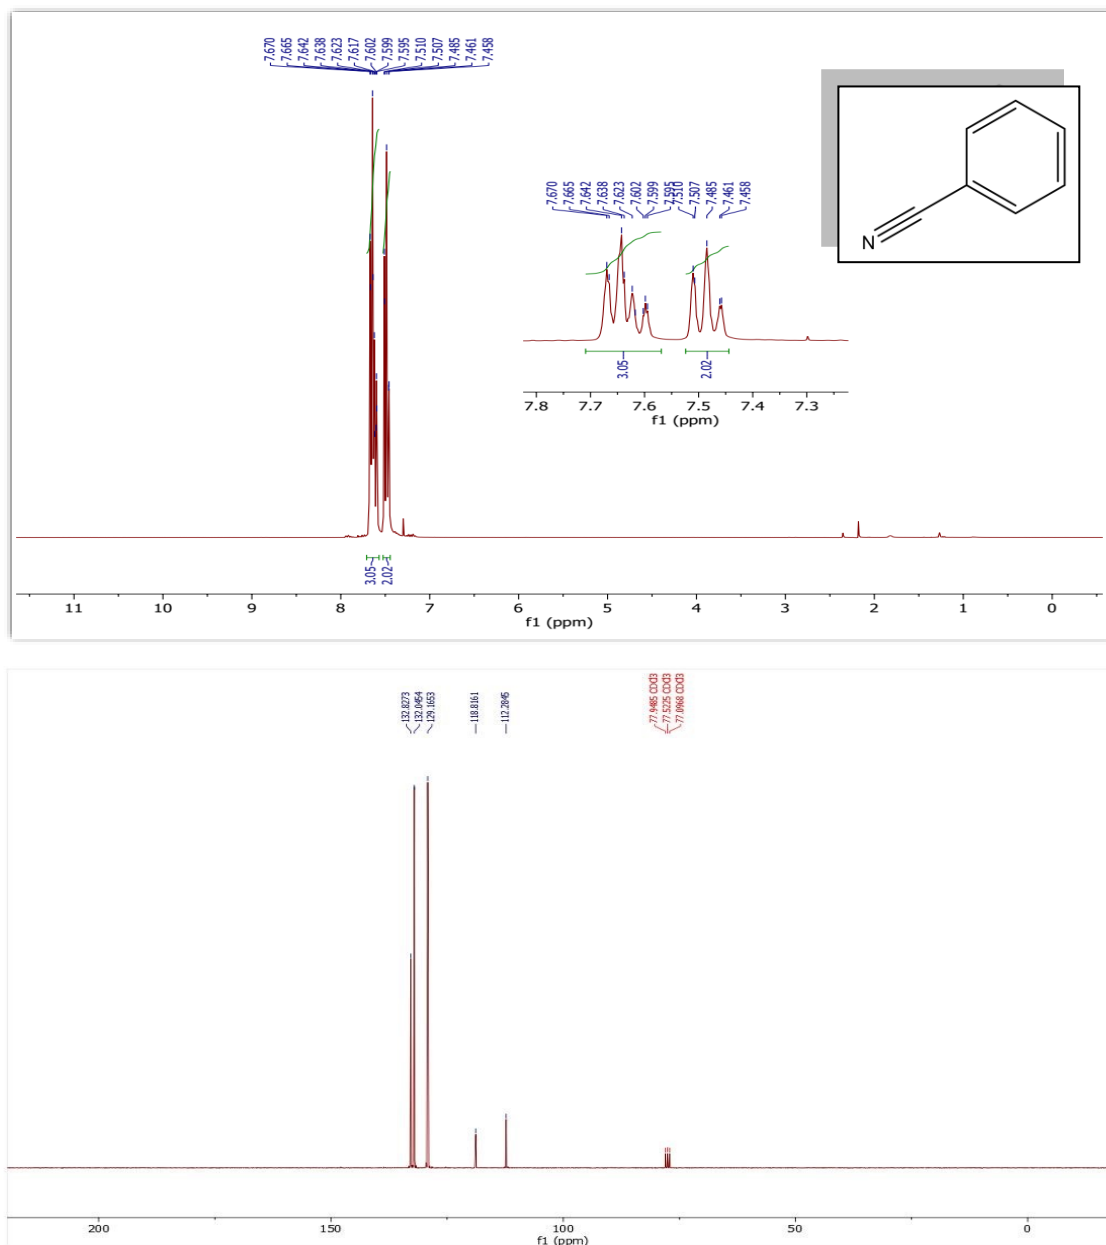

$^1\text{H}$  NMR and  $^{13}\text{C}$  NMR spectra of benzonitrile

$^1\text{H}$  NMR (300 MHz,  $\text{CDCl}_3$ ):  $\delta$  7.59-7.67 (m, 3 H), 7.48 (t,  $J = 7.8$  Hz, 2 H) ppm;  $^{13}\text{C}$  NMR (75 MHz,  $\text{CDCl}_3$ ):  $\delta$  132.8, 132.0, 129.1, 118.8, 112.2 ppm.

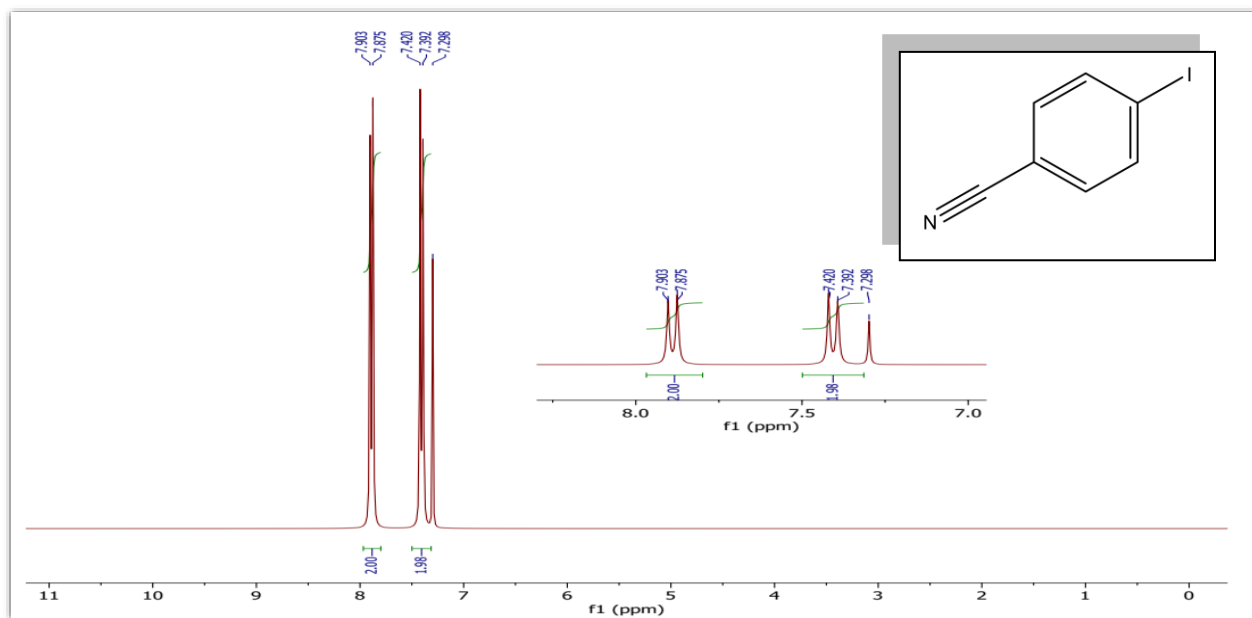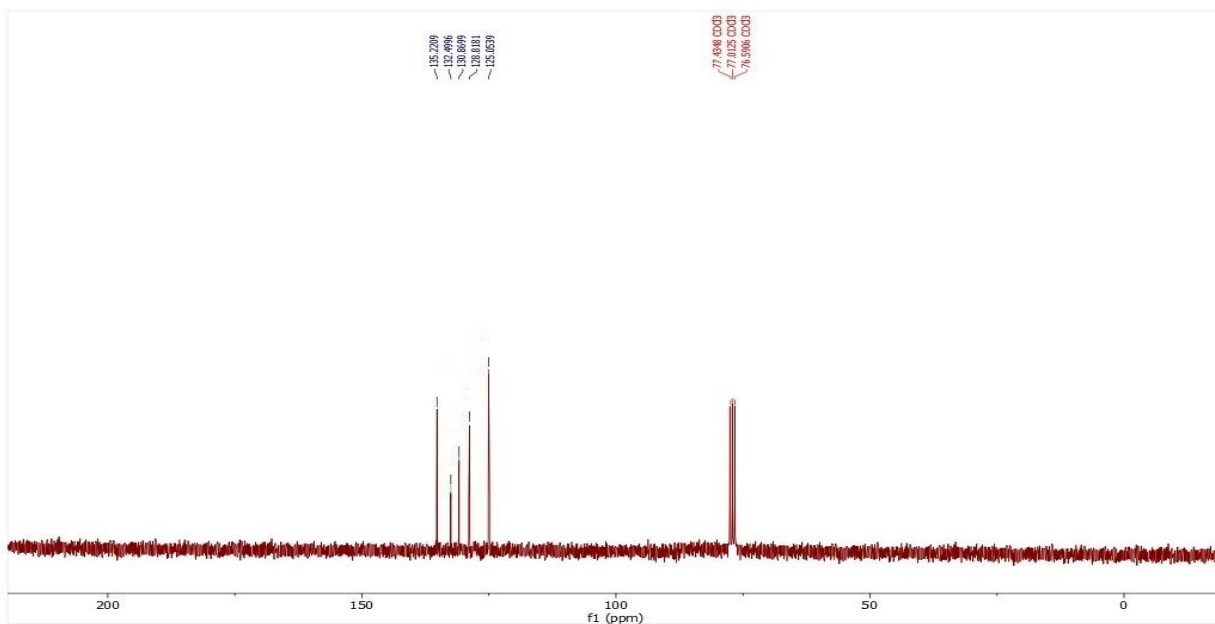

*<sup>1</sup>H NMR and <sup>13</sup>C NMR spectra of 4-iodobenzonitrile*

<sup>1</sup>H NMR (300 MHz, CDCl<sub>3</sub>): δ 7.89 (d, *J* = 8.4 Hz, 2 H), 7.40 (d, *J* = 8.4 Hz, 2 H) ppm; <sup>13</sup>C NMR (75 MHz, CDCl<sub>3</sub>): δ 135.2, 132.4, 130.8, 128.8, 125.0 ppm.

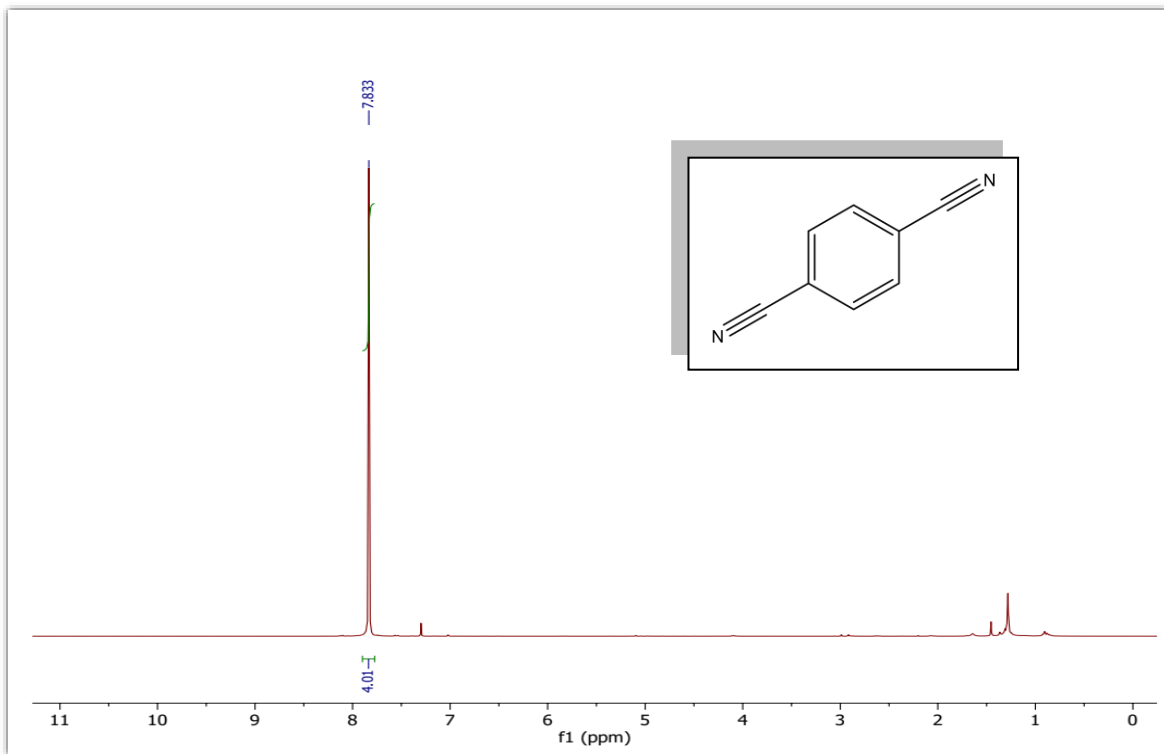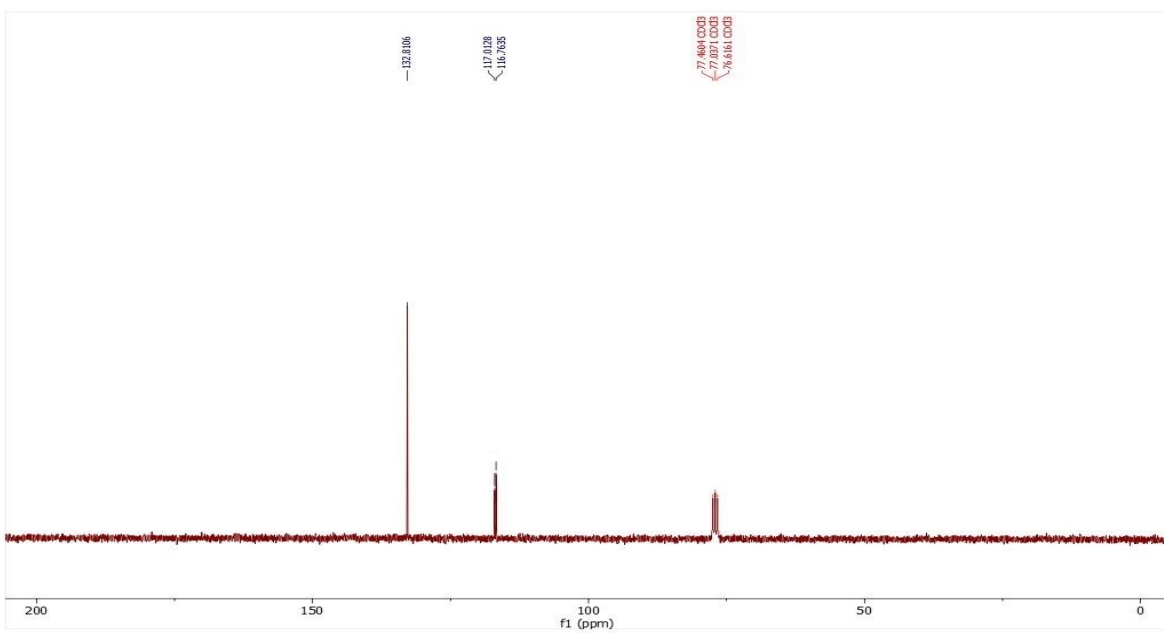

*<sup>1</sup>H NMR and <sup>13</sup>C NMR spectra of terephthalonitrile*

<sup>1</sup>H NMR (300 MHz, CDCl<sub>3</sub>): δ 7.83 (s, 4 H) ppm; <sup>13</sup>C NMR (75 MHz, CDCl<sub>3</sub>): δ 132.8, 117.0, 116.7 ppm.

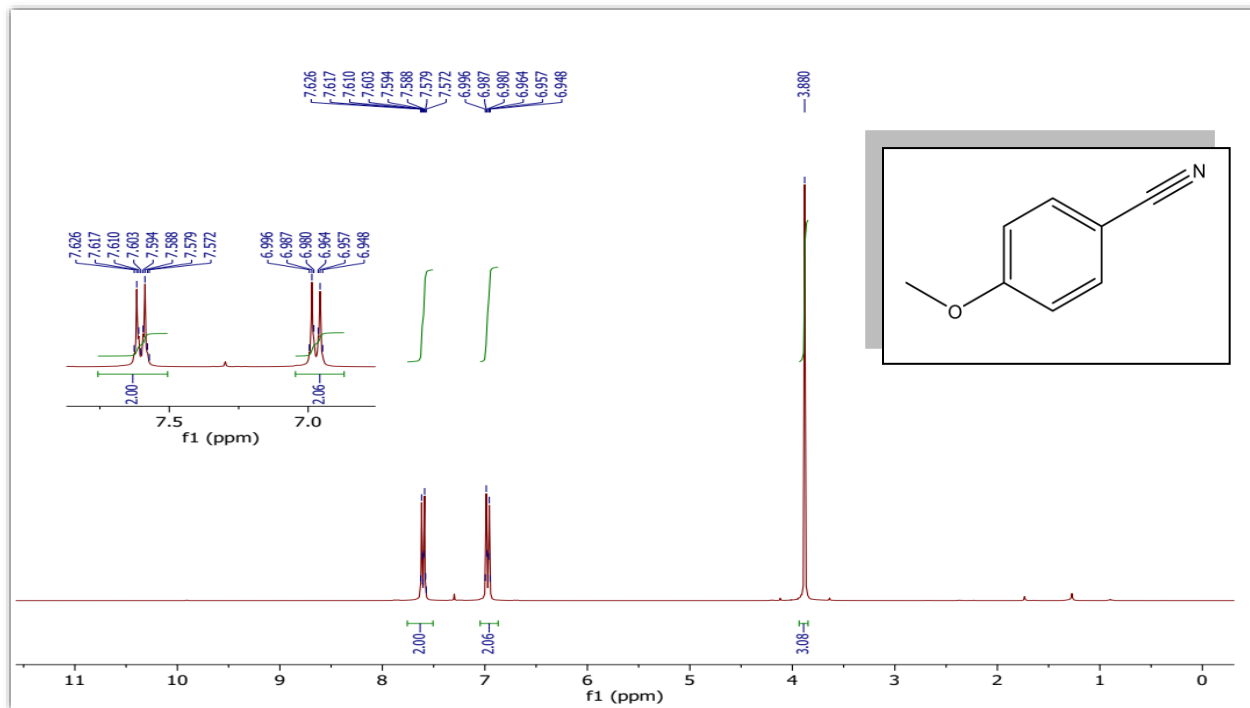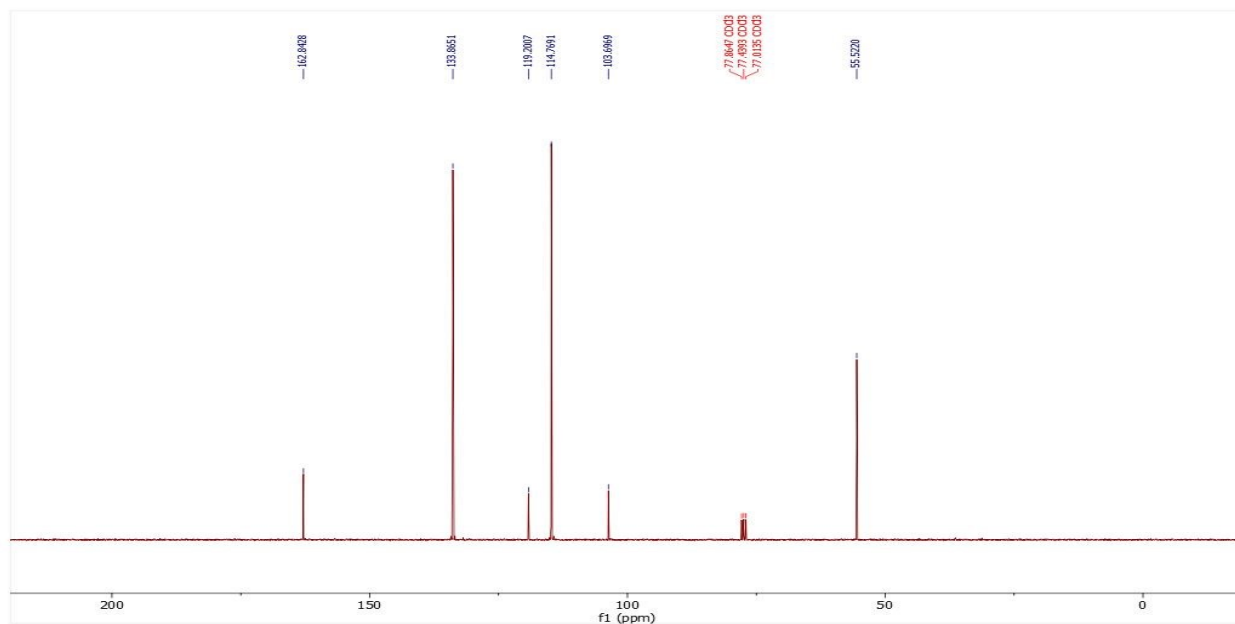

*<sup>1</sup>H NMR and <sup>13</sup>C NMR spectra of 4-methoxybenzonitrile*

<sup>1</sup>H NMR (300 MHz, CDCl<sub>3</sub>): δ 7.60 (d, *J* = 9 Hz, 2 H), 6.97 (d, *J* = 9 Hz, 2 H), 3.88 (s, 3 H) ppm; <sup>13</sup>C NMR (75 MHz, CDCl<sub>3</sub>): δ 162.8, 133.8, 119.2, 114.7, 103.6, 55.5 ppm.

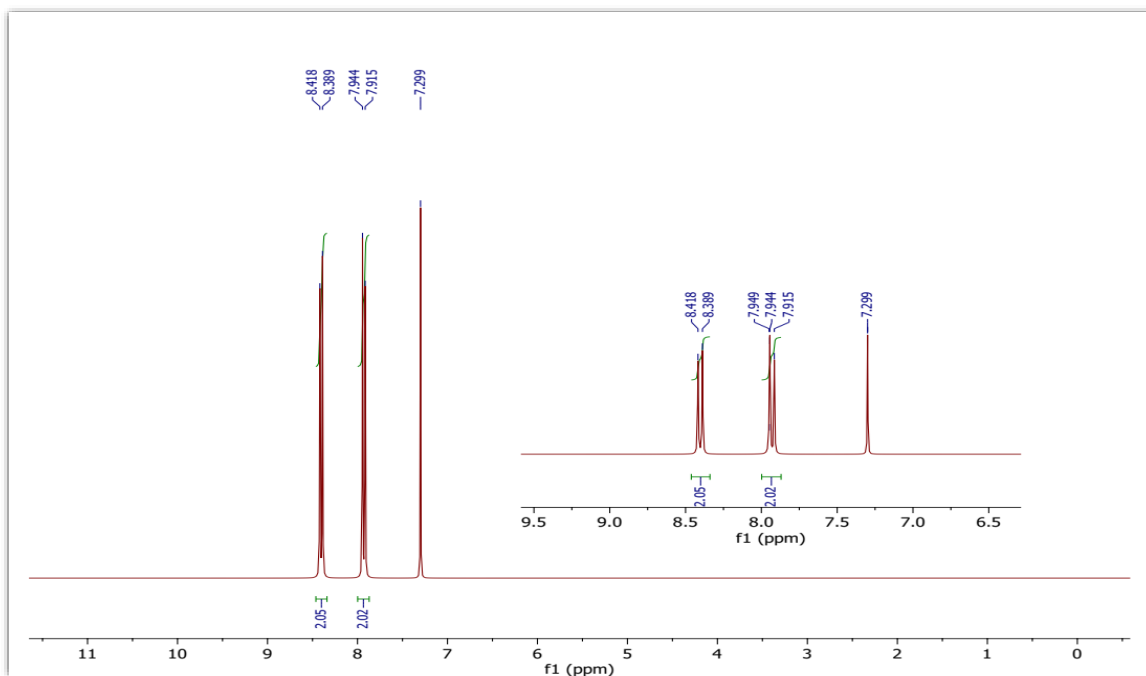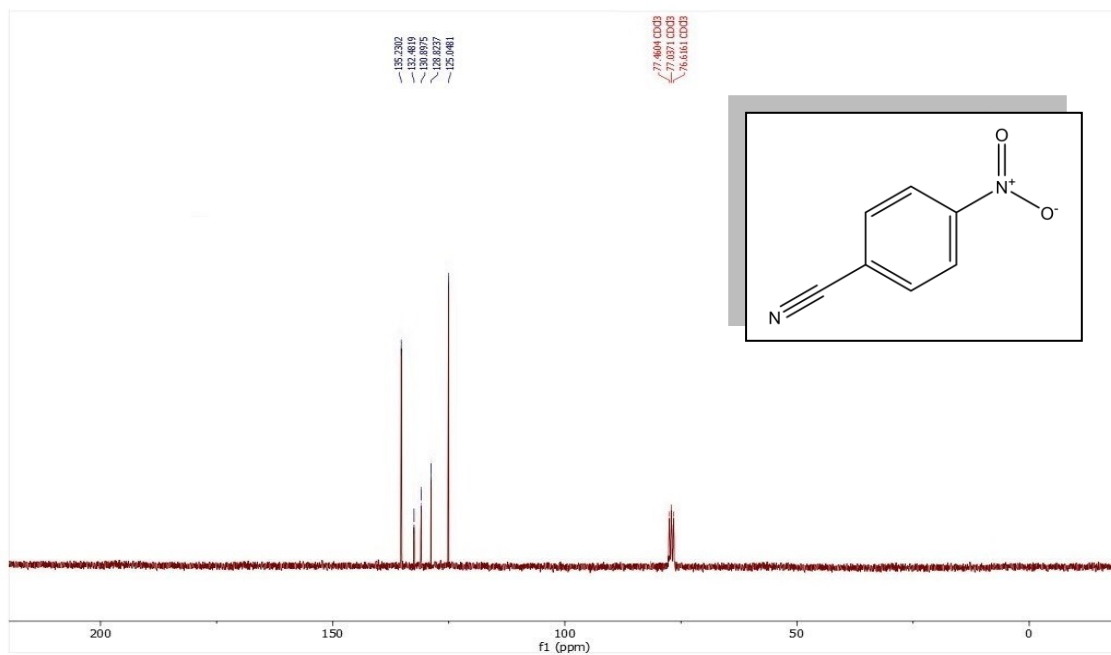

*<sup>1</sup>H NMR and <sup>13</sup>C NMR spectra of 4-nitrobenzonitrile*

<sup>1</sup>H NMR (300 MHz, CDCl<sub>3</sub>): δ 8.40 (d, *J* = 8.7 Hz, 2 H), 7.92 (d, *J* = 8.7 Hz, 2 H) ppm; <sup>13</sup>C NMR (75 MHz, CDCl<sub>3</sub>): δ 135.2, 132.4, 130.8, 128.8, 125.0 ppm.

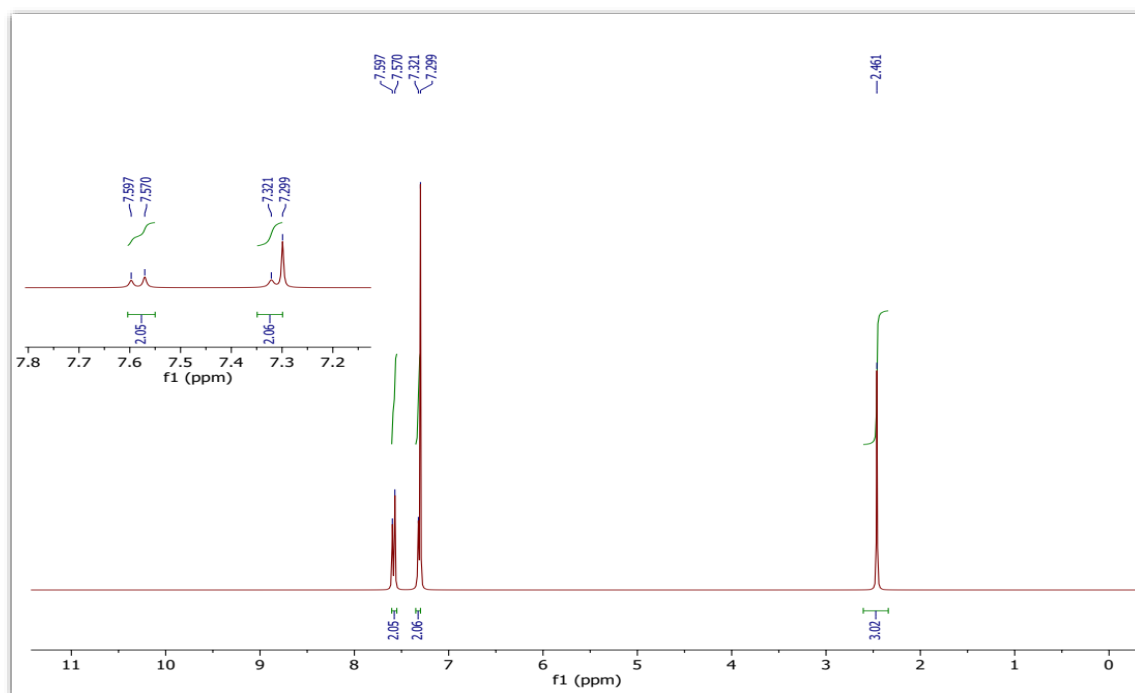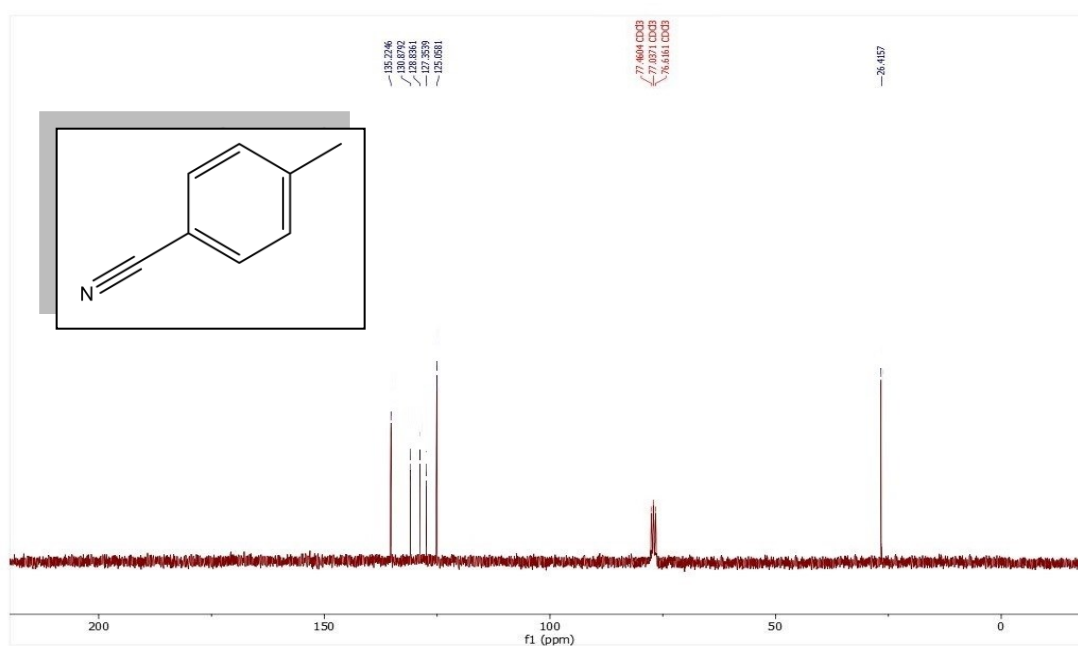

*<sup>1</sup>H NMR and <sup>13</sup>C NMR spectra of 4-methylbenzonitrile*

<sup>1</sup>H NMR (300 MHz, CDCl<sub>3</sub>): δ 7.58 (d, *J* = 8.1 Hz, 2 H), 7.31 (d, *J* = 6.6 Hz, 2 H), 2.46 (s, 3 H) ppm;

<sup>13</sup>C NMR (75 MHz, CDCl<sub>3</sub>): δ 135.2, 130.8, 128.8, 127.3, 125.0, 26.4 ppm.



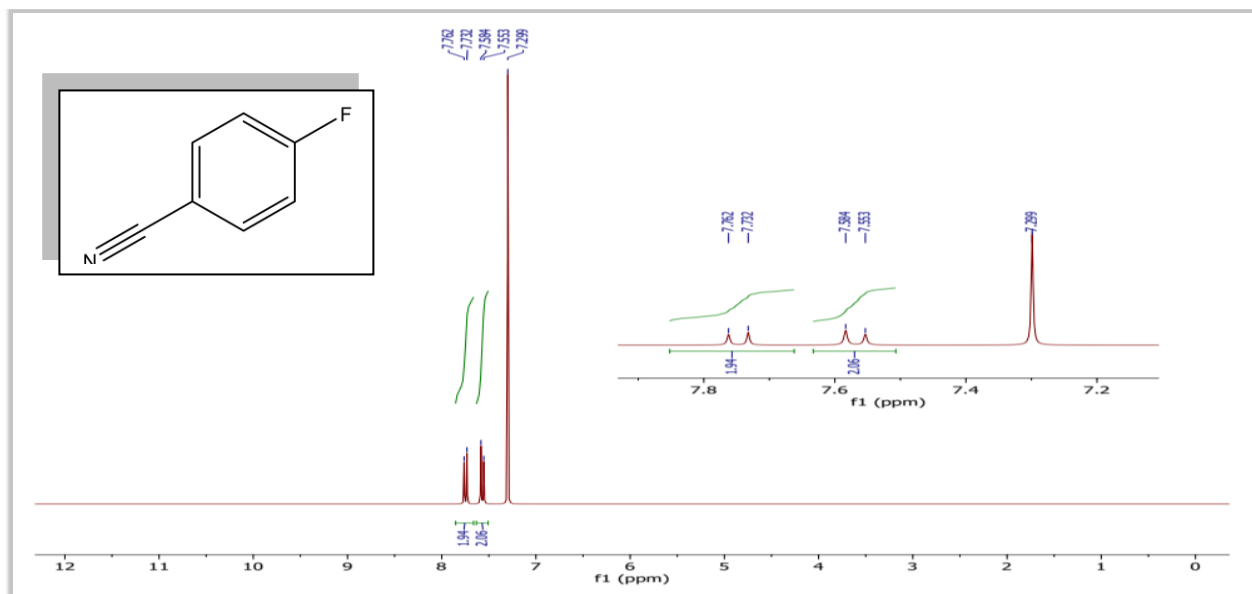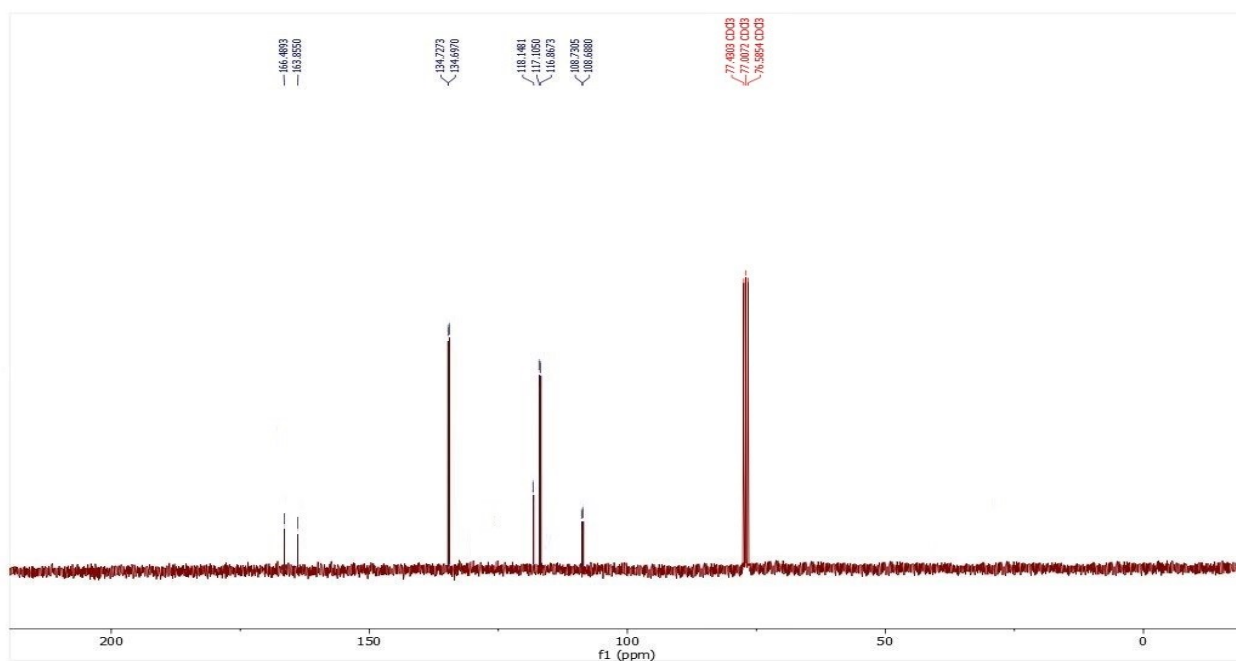

$^1\text{H}$  NMR and  $^{13}\text{C}$  NMR spectra of 4-fluorobenzonitrile

$^1\text{H}$  NMR (300 MHz,  $\text{CDCl}_3$ ):  $\delta$  7.74 (d,  $J = 9$  Hz, 2 H), 7.56 (d,  $J = 9.3$  Hz, 2 H) ppm;  $^{13}\text{C}$  NMR (75 MHz,  $\text{CDCl}_3$ ):  $\delta$  165.1 (d,  $J_{\text{C-F}} = 195$  Hz), 134.6 (d,  $J_{\text{C-F}} = 7.5$  Hz), 118.1, 116.9 (d,  $J_{\text{C-F}} = 22.5$  Hz), 108.6 (d,  $J_{\text{C-F}} = 3.7$  Hz) ppm.

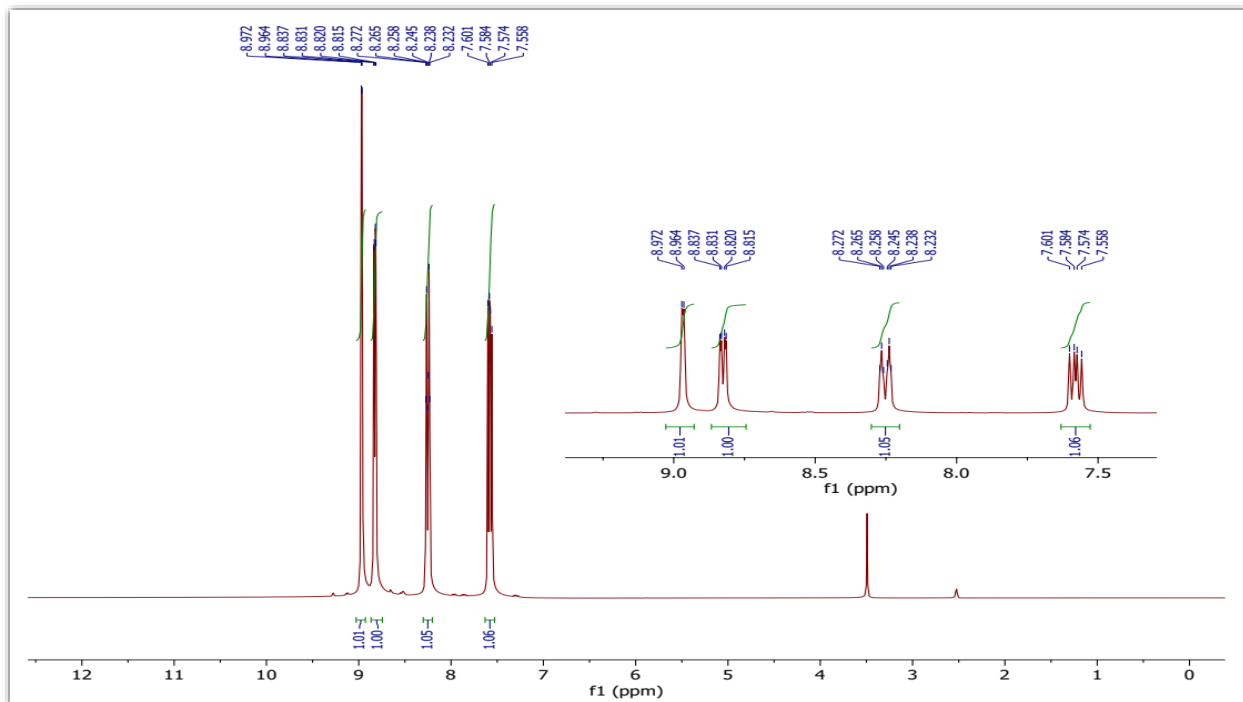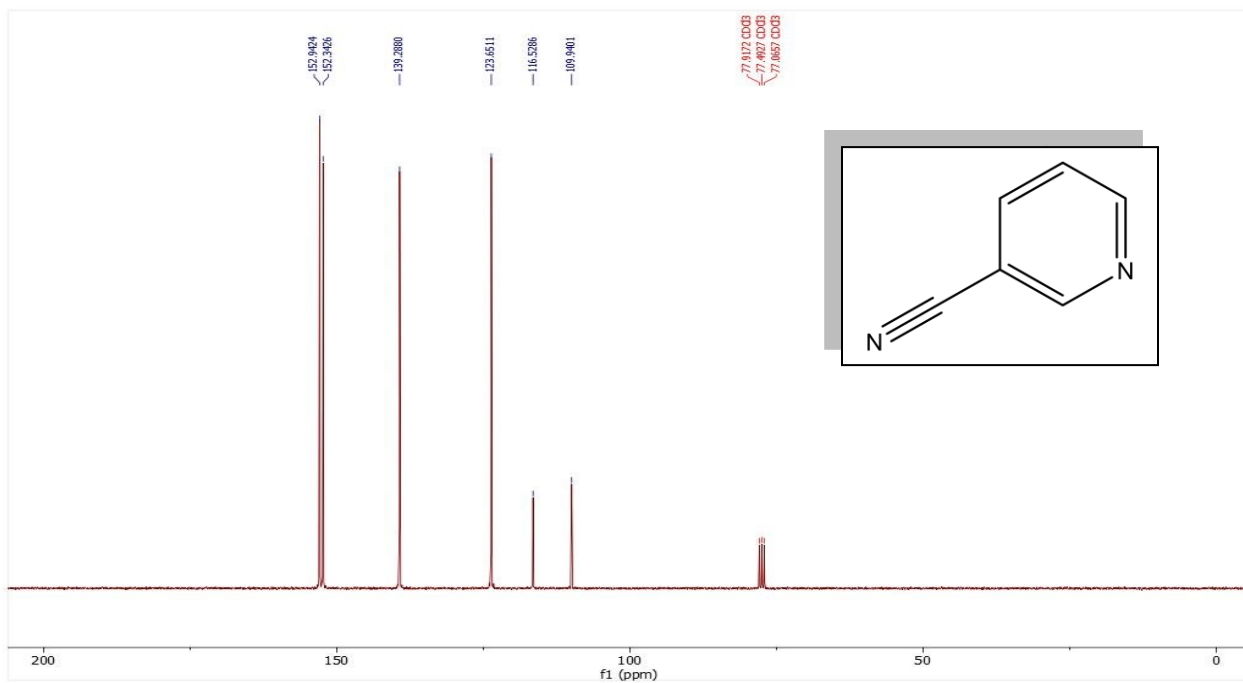

*<sup>1</sup>H NMR and <sup>13</sup>C NMR spectra of nicotinonitrile*

<sup>1</sup>H NMR (300 MHz, DMSO-*d*<sub>6</sub>): δ 8.96 (s, 1 H), 8.82 (d, *J* = 5.1 Hz, 1 H), 8.25 (d, *J* = 8.1 Hz, 1 H), 7.56-7.60 (m, 1 H) ppm; <sup>13</sup>C NMR (75 MHz, CDCl<sub>3</sub>): δ 152.9, 152.3, 139.2, 123.6, 116.5, 109.9 ppm.

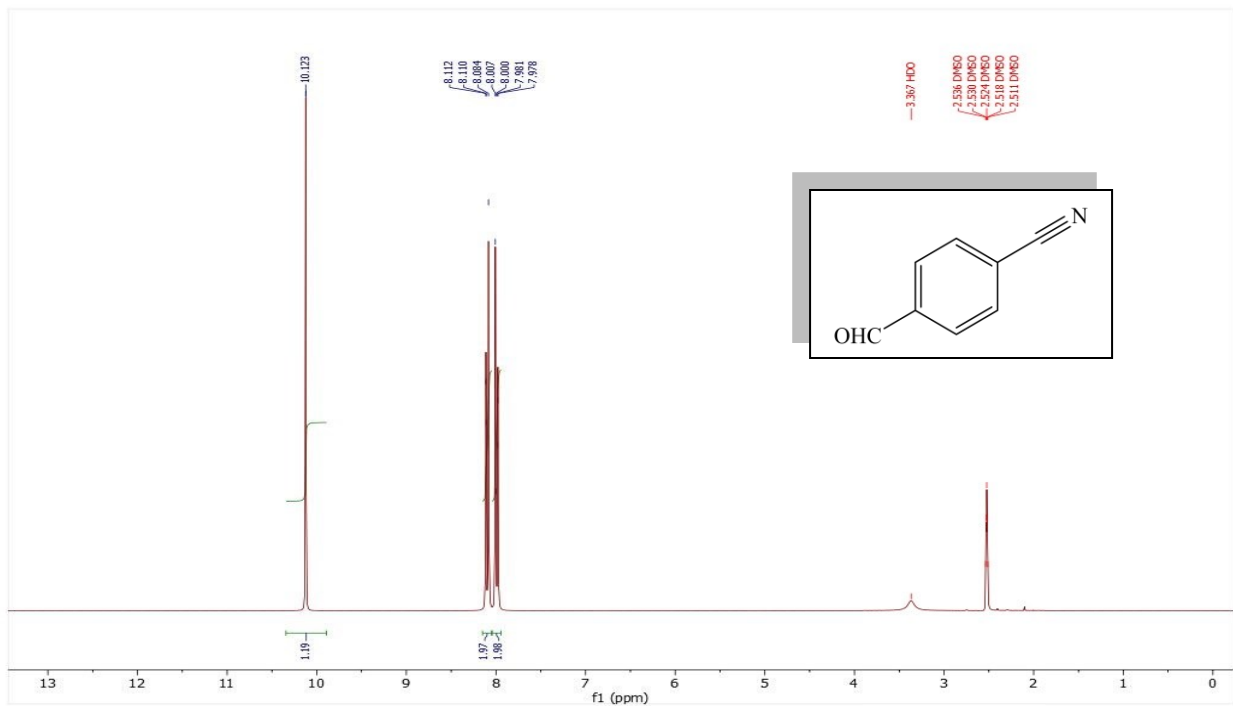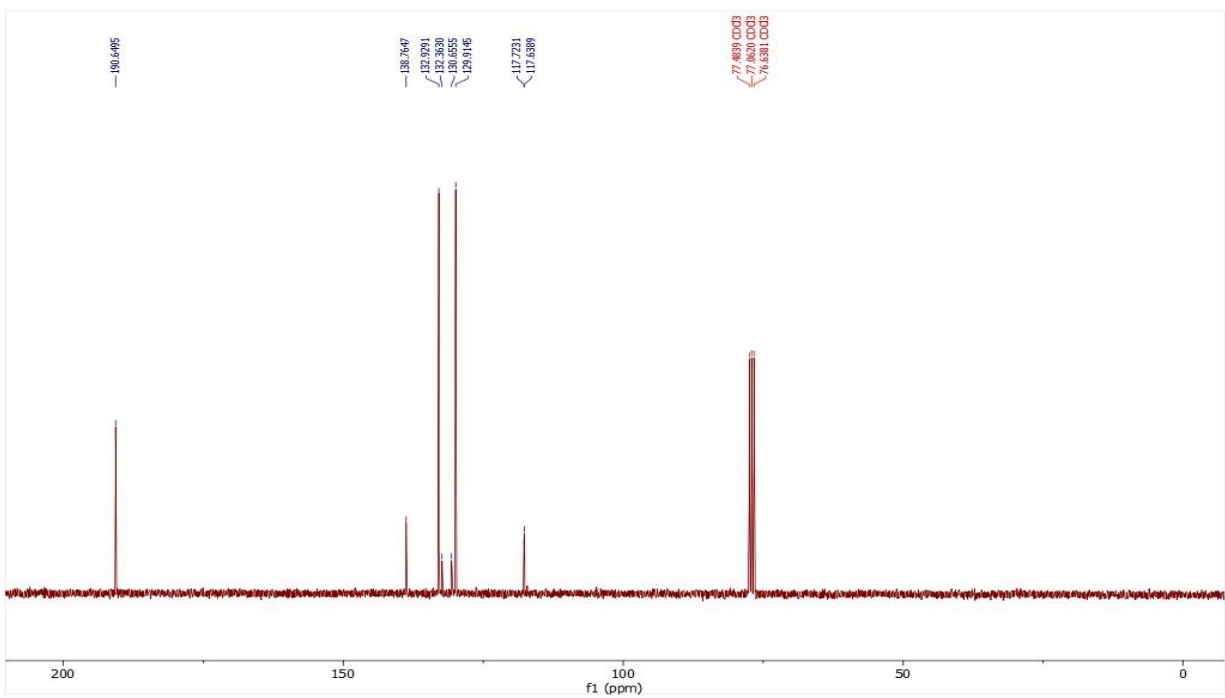

<sup>1</sup>H NMR and <sup>13</sup>C NMR spectra of 4-cyanobenzaldehyde

<sup>1</sup>H NMR (300 MHz, DMSO-*d*<sub>6</sub>): δ 10.12 (s, 1 H), 8.09 (d, *J* = 7.8, 2 H), 7.99 (d, *J* = 7.8, 2 H) ppm; <sup>13</sup>C NMR (75 MHz, CDCl<sub>3</sub>): δ 190.6, 138.7, 132.9, 129.9, 117.7 ppm.

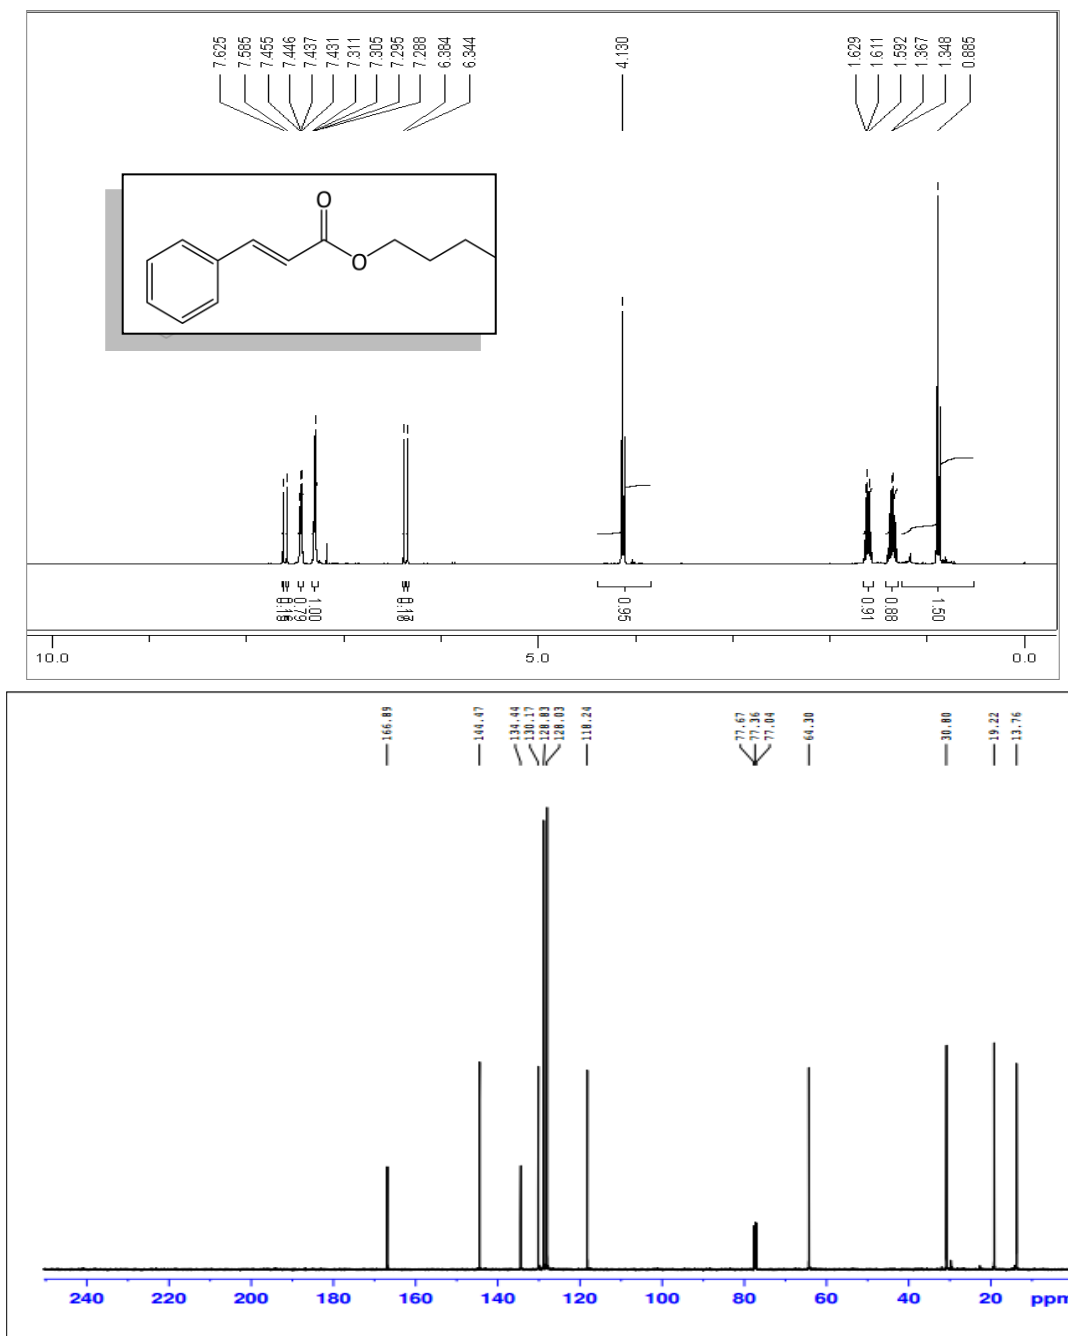

<sup>1</sup>H NMR and <sup>13</sup>C NMR spectra of (E)-n-butyl cinnamate

<sup>1</sup>H NMR (400 MHz, CDCl<sub>3</sub>): δ 7.60 (d, 1H, <sup>3</sup>J = 16.4 Hz), 7.43-7.45 (m, 2H), 7.29-7.30 (m, 3H), 6.36 (d, 1H, <sup>3</sup>J = 16.0 Hz), 4.13 (t, 2H, <sup>3</sup>J = 6.8 Hz), 1.59-1.62 (m, 2H), 1.34-1.36 (m, 2H), δ 0.88 (t, 3H, <sup>3</sup>J = 7.6 Hz) ppm. <sup>13</sup>C NMR (100 MHz, CDCl<sub>3</sub>): δ 166.8, 144.4, 134.4, 130.1, 128.8, 128.0, 118.2, 64.3, 30.8, 19.2, 13.7 ppm.

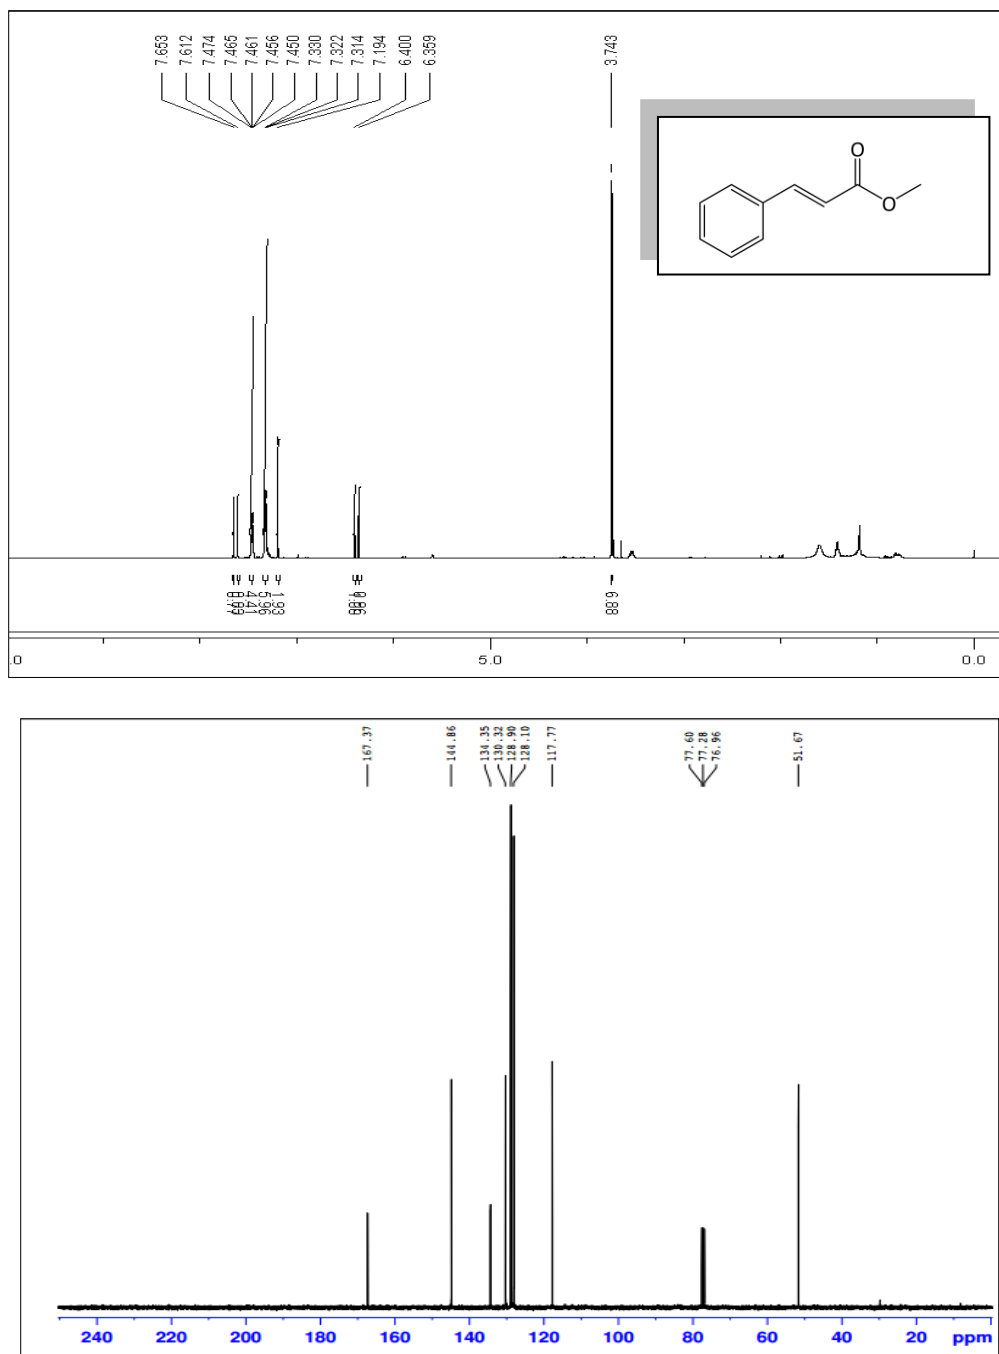

<sup>1</sup>H NMR and <sup>13</sup>C NMR spectra of *(E)*-methyl cinnamate

<sup>1</sup>H NMR (400 MHz, CDCl<sub>3</sub>): δ 7.63 (d, 1H, <sup>3</sup>J = 16.4 Hz), 7.45-7.47 (m, 2H), 7.31-7.33 (m, 3H), 6.38 (d, 1H, <sup>3</sup>J = 16.4 Hz), 3.74 (s, 3H) ppm. <sup>13</sup>C NMR (100 MHz, CDCl<sub>3</sub>): δ 167.3, 144.8, 134.3, 130.3, 128.9, 128.1, 117.7, 51.6 ppm.

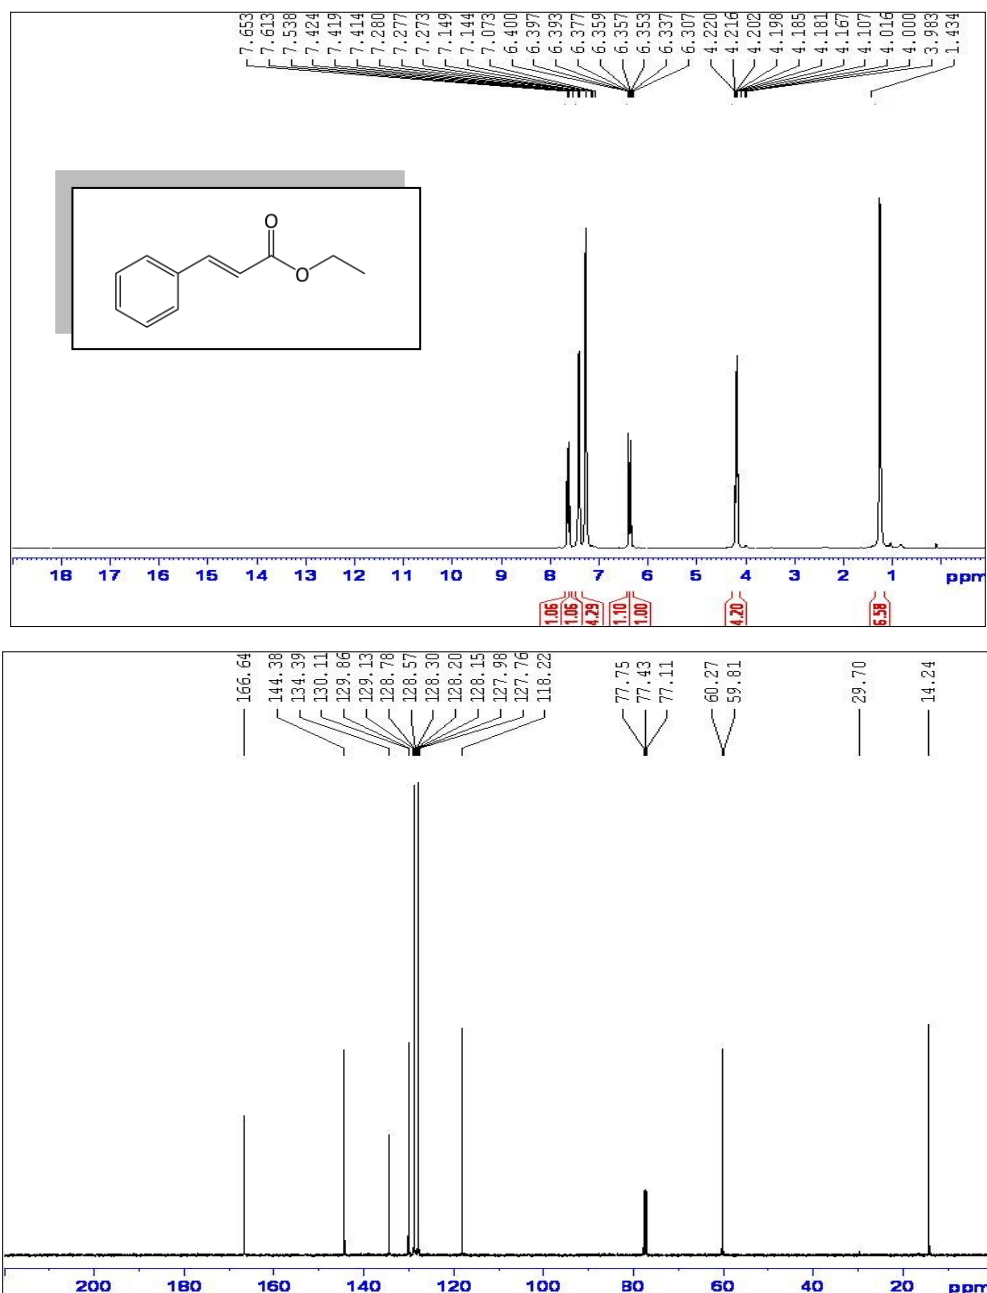

<sup>1</sup>H NMR and <sup>13</sup>C NMR spectra of (E)-ethyl cinnamate

<sup>1</sup>H NMR (400 MHz, CDCl<sub>3</sub>): δ 7.63 (d, 1H, <sup>3</sup>J = 16.0 Hz), 7.41-7.42 (m, 2H), 7.27-7.28 (m, 3H), 6.35 (d, 1H, <sup>3</sup>J = 16.0 Hz), 4.19 (q, 2H, <sup>3</sup>J = 8.0 Hz), 1.43 (t, 3H, <sup>3</sup>J = 8.0 Hz) ppm. <sup>13</sup>C NMR (100 MHz, CDCl<sub>3</sub>): δ 166.6, 144.3, 134.3, 130.1, 128.7, 127.9, 118.2, 60.0, 14.2 ppm.

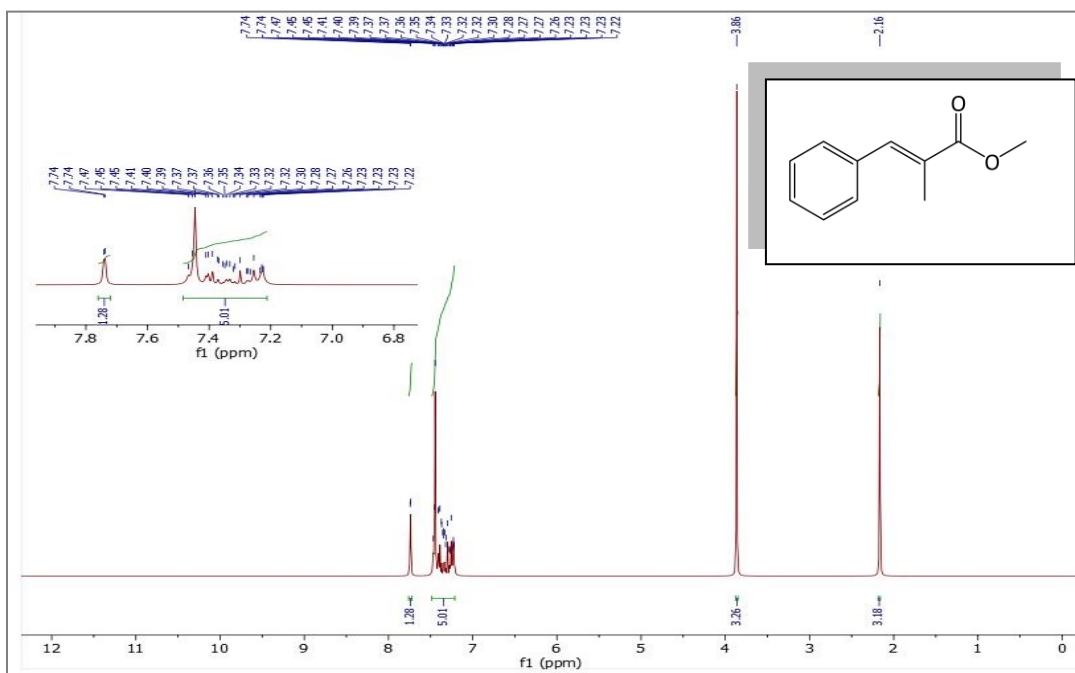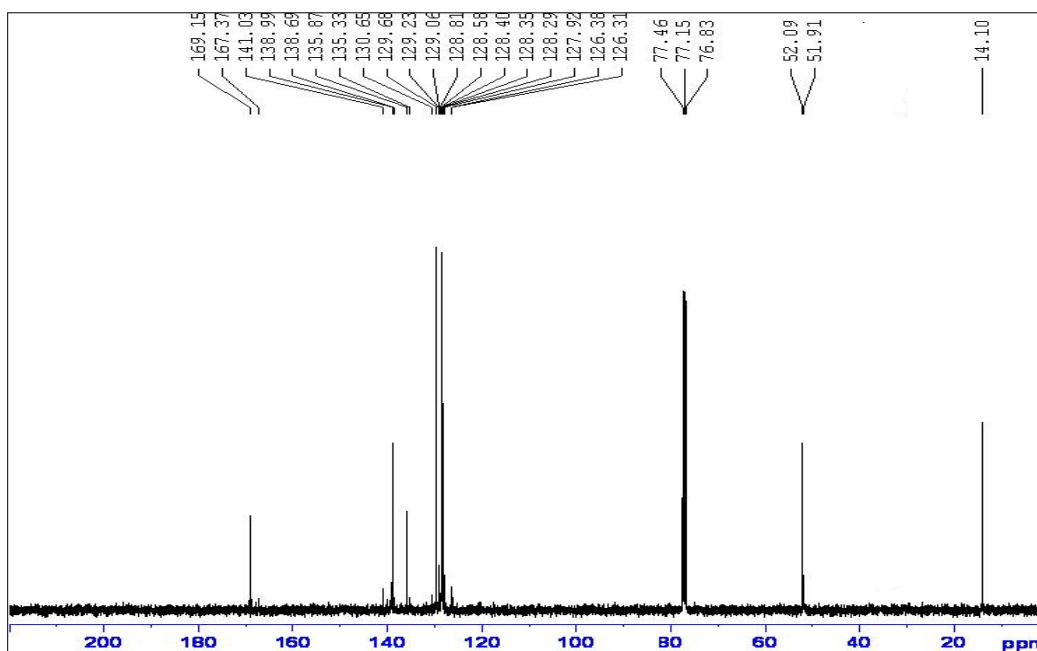

$^1\text{H NMR}$  and  $^{13}\text{C NMR}$  spectra of (E)-methyl 2-methyl-3-phenylacrylate

$^1\text{H NMR}$  (300 MHz,  $\text{CDCl}_3$ ):  $\delta$  7.74 (s, 1H), 7.22-7.47 (m, 5H), 3.86 (s, 3H), 2.16 (s, 3H) ppm.  $^{13}\text{C NMR}$  (100 MHz,  $\text{CDCl}_3$ ):  $\delta$  169.1, 138.9, 135.8, 129.6, 127.9, 52.0, 14.1 ppm.

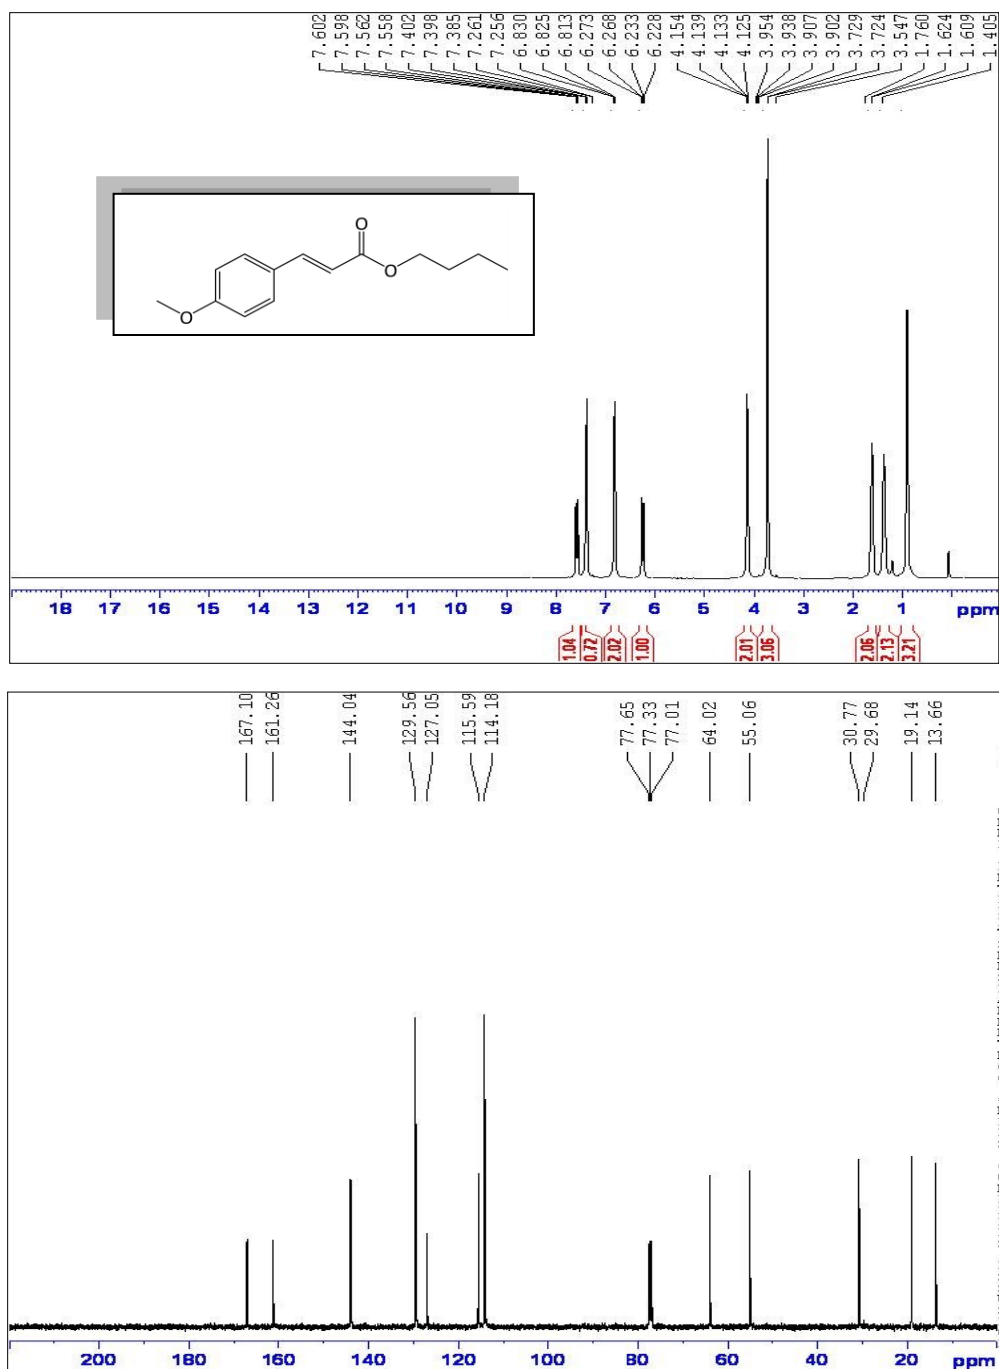

<sup>1</sup>H NMR and <sup>13</sup>C NMR spectra of (E)-n-butyl 3-(4-methoxyphenyl) acrylate

<sup>1</sup>H NMR (400 MHz, CDCl<sub>3</sub>): δ 7.58 (d, 1H, <sup>3</sup>J = 16.0 Hz), 7.39 (d, 3H, <sup>3</sup>J = 4.2 Hz), 6.24 (d, 1H, <sup>3</sup>J = 16.0 Hz), 4.13 (m, 2H, <sup>3</sup>J = 7.0 Hz), 3.72 (s, 3H), 1.60-1.62 (m, 2H), 1.35-1.40 (m, 2H), 0.91 (t, 3H, <sup>3</sup>J = 7.0 Hz) ppm. <sup>13</sup>C NMR (100 MHz, CDCl<sub>3</sub>): δ 167.1, 161.2, 144.0, 129.5, 127.0, 115.5, 114.1, 64.0, 55.0, 30.7, 19.1, 13.6 ppm.



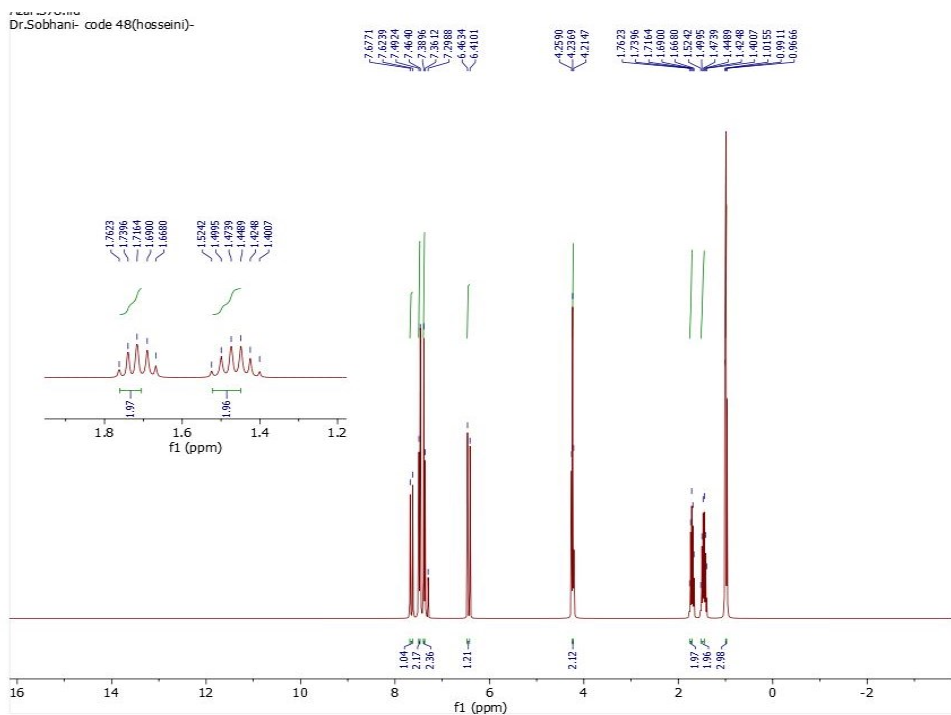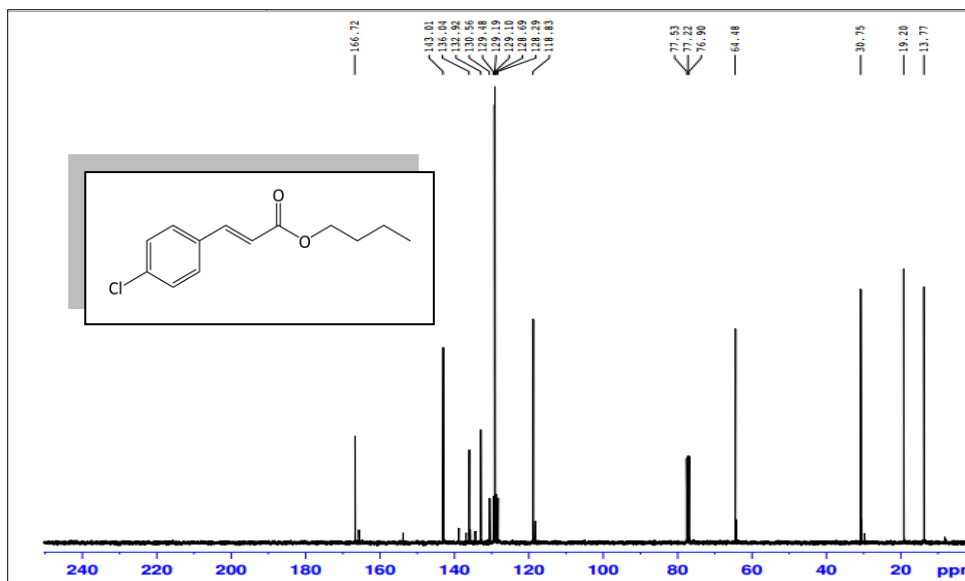

*<sup>1</sup>H NMR and <sup>13</sup>C NMR spectra of (E)-n-butyl 3-(4-chlorophenyl) acrylate*

<sup>1</sup>H NMR (300 MHz, CDCl<sub>3</sub>): δ 7.65 (d, 1H, <sup>3</sup>J = 16.0 Hz), 7.47 (d, 2H, <sup>3</sup>J = 8.5 Hz), 7.37 (d, 2H, <sup>3</sup>J = 8.5 Hz), 6.43 (d, 1H, <sup>3</sup>J = 16.0 Hz), 4.24 (t, 2H, <sup>3</sup>J = 6.6 Hz), 1.40-1.52 (m, 2H), 1.67-1.76 (m, 2H), 0.99 (t, 3H, <sup>3</sup>J = 7.3 Hz) ppm. <sup>13</sup>C NMR (100 MHz, CDCl<sub>3</sub>): δ 166.7, 143.0, 136.0, 132.9, 129.4, 129.1, 118.8, 64.4, 30.7, 19.2, 13.7 ppm.

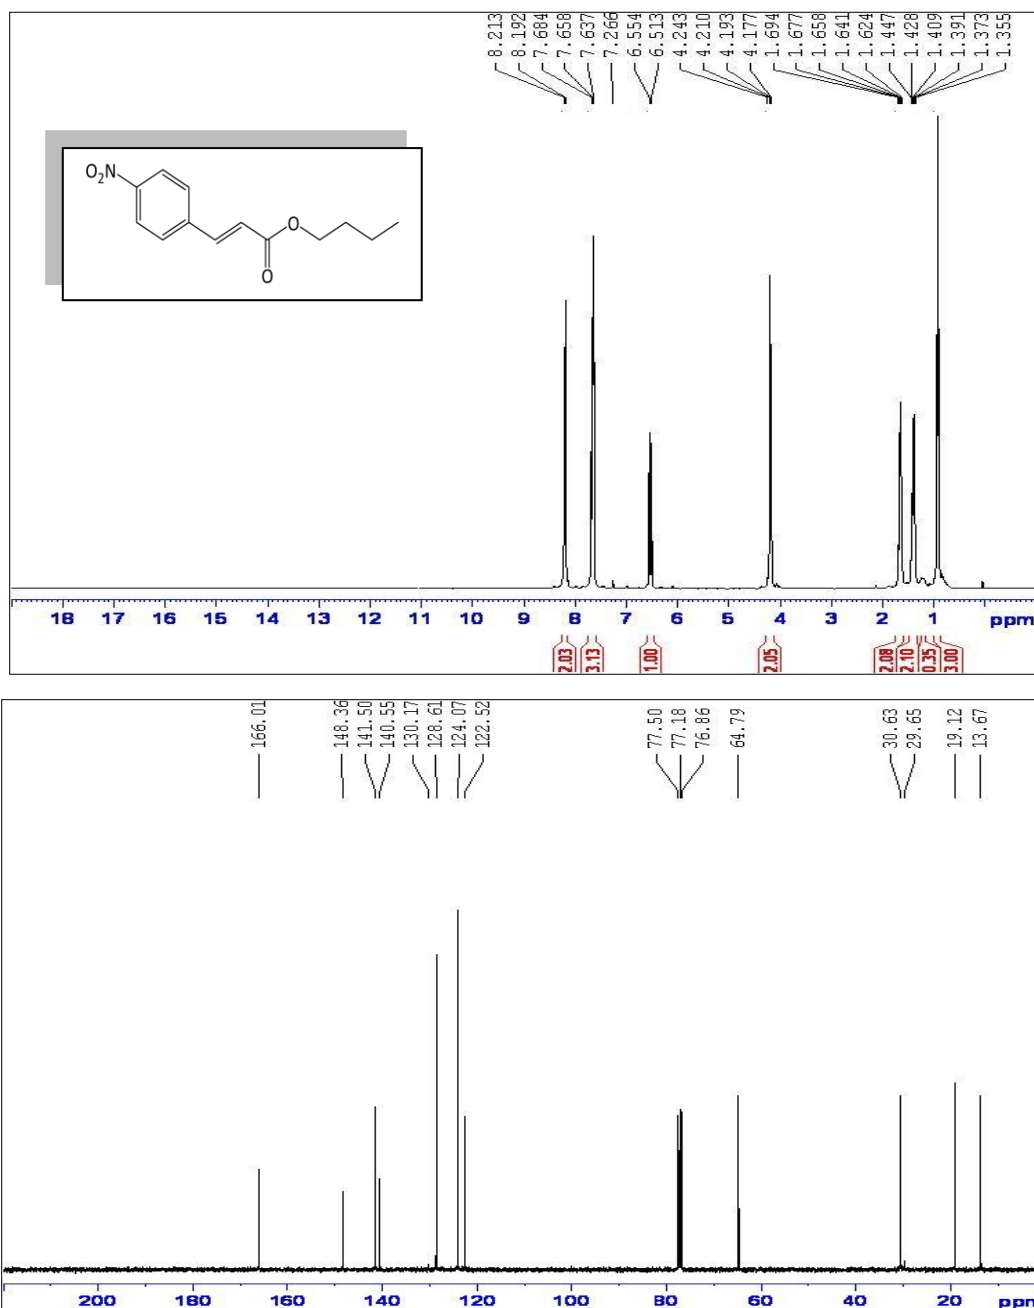

<sup>1</sup>H NMR and <sup>13</sup>C NMR spectra of *(E)*-n-butyl 3-(4-nitrophenyl) acrylate

<sup>1</sup>H NMR (400 MHz, CDCl<sub>3</sub>): δ 8.20 (d, 2H, <sup>3</sup>J = 8.0 Hz), 7.63-7.68 (m, 3H), 6.53 (d, 1H, <sup>3</sup>J = 16.0 Hz), 4.17-4.24 (m, 2H), 1.62-1.69 (m, 2H), 1.35-1.44 (m, 2H), 0.92 (t, 3H, <sup>3</sup>J = 7.2 Hz) ppm. <sup>13</sup>C NMR (100 MHz, CDCl<sub>3</sub>): δ 166.0, 148.3, 141.5, 140.5, 128.6, 124.0, 122.5, 64.7, 30.6, 19.1, 13.6 ppm.

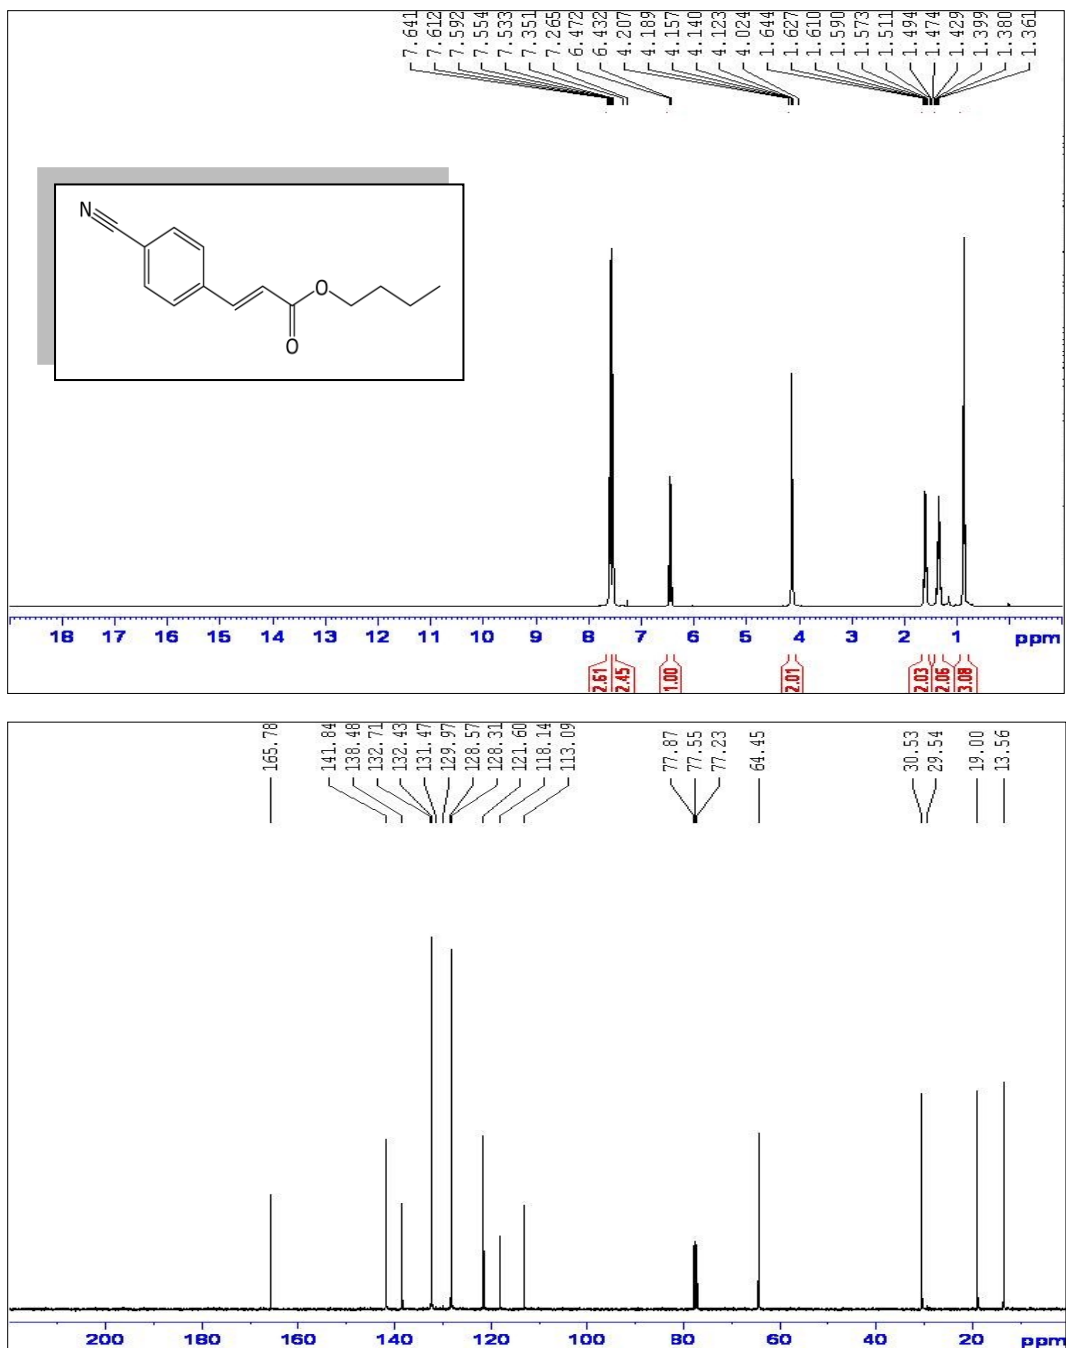

<sup>1</sup>H NMR and <sup>13</sup>C NMR spectra of (E)-n-butyl 3-(4-cyanophenyl) acrylate

<sup>1</sup>H NMR (400 MHz, CDCl<sub>3</sub>): δ 7.60 (d, 2H, <sup>3</sup>J = 8.0 Hz), 7.57 (d, 1H, <sup>3</sup>J = 15.2 Hz), 7.54 (d, 2H, <sup>3</sup>J = 8.4 Hz), 6.45 (d, 1H, <sup>3</sup>J = 16.0 Hz), 4.14 (t, 2H, <sup>3</sup>J = 6.8 Hz), 1.57-1.64 (m, 2H), 1.30-1.38 (m, 2H), 0.77 (t, 3H, <sup>3</sup>J = 7.0 Hz) ppm. <sup>13</sup>C NMR (100 MHz, CDCl<sub>3</sub>): δ 165.7, 141.8, 138.4, 132.4, 128.3, 121.6, 118.1, 113.0, 64.4, 30.5, 19.0, 13.5 ppm.
